# Supplementary material for: Heck reaction of arenediazonium salts with N,N-diprotected allylamines. Synthesis of cinnamylamines and indoles
Source: Royal Society of Chemistry journal article supplement (doi:10.1039/c0ob01052a), 2011-01-01
Supplement: c0ob01052a.pdf [file c0ob01052a.pdf]

# Electronic supplementary information

## Heck reaction of arenediazonium salts with *N,N*- diprotected allylamines. Synthesis of cinnamylamines and indoles

Sandro Cacchi,\* Giancarlo Fabrizi, Antonella Goggiamani, Alessio Sferrazza

*Dipartimento di Chimica e Tecnologie del Farmaco*

*La Sapienza, Università di Roma, P.le A. Moro 5, 00185 Rome, Italy.*

*sandro.cacchi@uniroma1.it*

### Contents:

|                                                            |    |
|------------------------------------------------------------|----|
| 1. General information                                     | S2 |
| 2. Characterization data of cinnamylamines <b>3a – 3f</b>  | S2 |
| 3. Characterization data of cinnamylamines <b>3g – 3o</b>  | S3 |
| 4. Characterization data of compounds <b>5a – 5e</b>       | S5 |
| 5. Characterization data of indoles <b>7a – 7d</b>         | S6 |
| 6. Characterization data of indoles <b>7e – 7h</b>         | S7 |
| 7. One-pot synthesis of <b>12</b>                          | S8 |
| 8. References                                              | S8 |
| 9. Scans of <sup>1</sup> H and <sup>13</sup> C NMR spectra | S9 |

## 1. General information.

**Reagents and methods.** All the starting materials, catalysts, bases, and solvents are commercially available and were used as purchased, without further purification. All the products were purified on axially compressed columns, packed with SiO<sub>2</sub> 25-40 μm, connected to a solvent delivery system and to a refractive index detector, and eluting with *n*-hexane/AcOEt mixtures.

2-(Alkynyl)trifluoroacetanilides,<sup>1</sup> arenediazonium tetrafluoroborates,<sup>2</sup> and *N,N*-di-Boc-allylamine<sup>3</sup> were prepared according to literature.

## 2. Cinnamylamines 3a - 3f.

**General procedure:** an oven-dried Schlenk tube equipped with a magnetic stirring bar was charged under argon with arenediazonium salt (0.5 mmol), *N,N*-(Boc)<sub>2</sub> allylamine (0.55 mmol), Pd<sub>2</sub>(dba)<sub>3</sub> (0.01 mmol), NaOAc (1.5 mmol), and anhydrous MeCN (5 mL). The tube was protected from light with aluminum film, sealed and stirred at room temperature for the indicated time. Then, the reaction mixture was diluted with Et<sub>2</sub>O, washed twice with H<sub>2</sub>O, and with a saturated NaCl solution. The organic phase was separated, dried over Na<sub>2</sub>SO<sub>4</sub>, filtered, and concentrated under reduced pressure. The residue was purified by chromatography on silica gel, eluting with a *n*-hexane/AcOEt mixture.

### 3a.

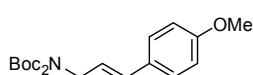

3 h, pale yellow liquid, yield: 90 %.

<sup>1</sup>H NMR (400 MHz, CDCl<sub>3</sub>) δ: 7.31 (d, *J* = 8.8 Hz, 2H), 6.86 (d, *J* = 8.8 Hz, 2H), 6.50 (d, *J* = 16.0 Hz, 1H), 6.10 (dt, *J* = 15.6 Hz, *J* = 6.4 Hz, 1H), 4.32 (dd, *J* = 5.6 Hz, *J* = 1.2 Hz, 2H), 3.82 (s, 3H), 1.53 (s, 18H);

<sup>13</sup>C NMR (100 MHz, CDCl<sub>3</sub>) δ: 159.3, 152.4, 131.9, 129.6, 127.6, 122.9, 114.0, 82.3, 55.3, 48.3, 28.1;

IR (neat, cm<sup>-1</sup>): 2979, 2935, 1745, 1695, 1608, 1542, 1367, 1250, 1146, 1114;

Anal. Calcd. for C<sub>20</sub>H<sub>29</sub>NO<sub>5</sub>: C, 66.09; H, 8.04; Found: C, 66.19; H, 8.11.

### 3b.

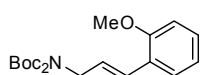

1.5 h, white solid, mp 65-66 °C, yield: 85 %.

<sup>1</sup>H NMR (400 MHz, CDCl<sub>3</sub>) δ: 7.42 (d, *J* = 7.2 Hz, 1H), 7.24 (dt, *J* = 8.0 Hz, *J* = 1.2 Hz, 1H), 6.95-6.87 (m, 3H), 6.22 (dt, *J* = 16.0 Hz, *J* = 6.4 Hz, 1H), 4.32 (d, *J* = 6.4 Hz, 2H), 3.85 (s, 3H), 1.54 (s, 18H);

<sup>13</sup>C NMR (100 MHz, CDCl<sub>3</sub>) δ: 156.7, 152.3, 128.6, 127.5, 126.9, 126.0, 125.6, 120.6, 110.8, 82.3, 55.3, 48.6, 28.1;

IR (KBr, cm<sup>-1</sup>): 2981, 2931, 1745, 1718, 1369, 1352, 1250, 1147, 1118, 756;

Anal. Calcd. for C<sub>20</sub>H<sub>29</sub>NO<sub>5</sub>: C, 66.09; H, 8.04; Found: C, 65.99; H, 8.13.

### 3c.

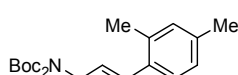

5 h, pale yellow liquid, yield: 83 %.

<sup>1</sup>H NMR (400 MHz, CDCl<sub>3</sub>) δ: 7.34 (d, *J* = 7.6 Hz, 1H), 7.00 (m, 2H), 6.74 (d, *J* = 16.0 Hz, 1H), 6.08 (dt, *J* = 15.6 Hz, *J* = 6.4 Hz, 1H), 4.35 (dd, *J* = 6.4 Hz, *J* = 1.2 Hz, 2H), 2.32 (s, 6H), 1.54 (s, 18H);

<sup>13</sup>C NMR (100 MHz, CDCl<sub>3</sub>) δ: 152.4, 137.2, 135.2, 133.1, 131.0, 130.1, 126.8, 125.7, 125.5, 82.3, 48.4, 28.1, 21.0, 19.7;

IR (neat, cm<sup>-1</sup>): 2979, 2931, 1747, 1697, 1367, 1352, 1225, 1147, 1117;

Anal. Calcd. for C<sub>21</sub>H<sub>31</sub>NO<sub>4</sub>: C, 69.78; H, 8.64; Found: C, 69.69; H, 8.58.

### 3d.

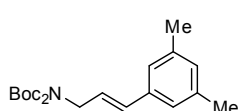

3 h, pale yellow liquid, yield: 72 %.

<sup>1</sup>H NMR (400 MHz, CDCl<sub>3</sub>) δ: 7.01 (s, 2H), 6.91 (s, 1H), 6.50 (d, *J* = 15.6 Hz, 1H), 6.21 (dt, *J* = 15.6 Hz, *J* = 6.4 Hz, 1H), 4.34 (d, *J* = 6.0 Hz, 2H), 2.33 (s, 6H), 1.54 (s, 18H);

**<sup>13</sup>C NMR** (100 MHz, CDCl<sub>3</sub>) δ: 152.4, 137.9, 136.8, 132.5, 129.3, 124.7, 124.3, 82.3, 48.2, 28.1, 21.2;

**IR** (neat, cm<sup>-1</sup>): 2979, 2933, 1788, 1747, 1697, 1477, 1456, 1433, 1385, 1367, 1352, 1223, 1115, 1145, 852, 733;

Anal. Calcd. for C<sub>21</sub>H<sub>31</sub>NO<sub>4</sub>: C, 69.78; H, 8.64; Found: C, 69.68; H, 8.68.

**3e.**

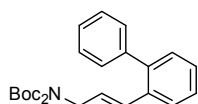

3 h, dark yellow liquid, yield: 61 %.

**<sup>1</sup>H NMR** (400 MHz, CDCl<sub>3</sub>) δ: 7.42 (m, 1H), 7.39-7.28 (m, 8H), 6.60 (d, *J* = 15.6 Hz, 1H), 6.20 (dt, *J* = 16.0 Hz, *J* = 6.0 Hz, 1H), 4.26 (dd, *J* = 6.4 Hz, *J* = 1.2 Hz, 2H), 1.48 (s, 18H);

**<sup>13</sup>C NMR** (100 MHz, CDCl<sub>3</sub>) δ: 152.3, 140.9, 140.8, 134.7, 131.1, 130.2, 129.8, 128.1, 127.5, 127.4, 127.0, 126.1, 126.0, 82.3, 48.2, 28.1;

**IR** (neat, cm<sup>-1</sup>): 2979, 2933, 1747, 1695, 1475, 1454, 1433, 1385, 1369, 1223, 1144, 1115;

Anal. Calcd. for C<sub>25</sub>H<sub>31</sub>NO<sub>4</sub>: C, 73.32; H, 7.63; Found: C, 73.22; H, 7.75.

**3f.** (Known compound)<sup>4</sup>

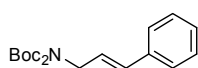

2.5 h, pale yellow liquid, yield: 80 %.

**<sup>1</sup>H NMR** (400 MHz, CDCl<sub>3</sub>) δ: 7.39-7.23 (m, 5H), 6.55 (d, *J* = 16.0 Hz, 1H), 6.23 (dt, *J* = 15.6 Hz, *J* = 6.4 Hz, 1H), 4.35 (d, *J* = 6.0 Hz, 2H), 1.54 (s, 18H).

### 3. Cinnamylamines 3g – 3o.

**General procedure:** an oven-dried Schlenk tube equipped with a magnetic stirring bar was charged under argon with arenediazonium salt (0.5 mmol), *N,N*-(Boc)<sub>2</sub> allylamine (0.55 mmol), Pd<sub>2</sub>(dba)<sub>3</sub> (0.01 mmol), CaCO<sub>3</sub> (0.75 mmol), and anhydrous MeOH (5 mL). The tube was protected from light with aluminum film, sealed, and stirred at room temperature for the indicated time. Then, the reaction mixture was diluted with Et<sub>2</sub>O, washed twice with H<sub>2</sub>O, and with a saturated NaCl solution. The organic phase was separated, dried over Na<sub>2</sub>SO<sub>4</sub>, filtered, and concentrated under reduced pressure. The residue was purified by chromatography on silica gel, eluting with a *n*-hexane/AcOEt mixture.

**3g.**

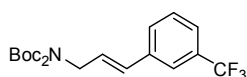

3.5 h, pale yellow liquid, yield: 83 %.

**<sup>1</sup>H NMR** (400 MHz, CDCl<sub>3</sub>) δ: 7.60 (s, 1H), 7.54-7.40 (m, 3H), 6.56 (d, *J* = 15.6 Hz, 1H), 6.31 (dt, *J* = 15.6 Hz, *J* = 2.4 Hz, 1H), 4.36 (dd, *J* = 6.0 Hz, *J* = 1.2 Hz, 2H), 1.53 (s, 18H);

**<sup>13</sup>C NMR** (100 MHz, CDCl<sub>3</sub>) δ: 152.3, 137.6, 131.0 (q, *J* = 32.1 Hz), 130.7, 129.5, 129.0, 127.3, 124.6 (q, *J* = 3.7 Hz), 124.1 (q, *J* = 271.2 Hz), 123.0 (q, *J* = 3.7 Hz), 82.5, 47.9, 28.1;

**IR** (neat, cm<sup>-1</sup>): 2981, 2935, 1747, 1695, 1369, 1333, 1165, 1146, 1124;

Anal. Calcd. for C<sub>20</sub>H<sub>26</sub>F<sub>3</sub>NO<sub>4</sub>: C, 59.84; H, 6.53; Found: C, 59.76; H, 6.46.

**3h.**

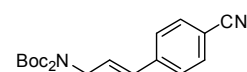

1.5 h, white solid, mp 100-101 °C, yield: 83 %.

**<sup>1</sup>H NMR** (400 MHz, CDCl<sub>3</sub>) δ: 7.60 (d, *J* = 8.4 Hz, 2H), 7.44 (d, *J* = 8.0 Hz, 2H), 6.54 (d, *J* = 16.0 Hz, 1H), 6.36 (dt, *J* = 16.0 Hz, *J* = 6.0 Hz, 1H), 4.37 (d, *J* = 5.6 Hz, 2H), 1.52 (s, 18H);

**<sup>13</sup>C NMR** (100 MHz, CDCl<sub>3</sub>) δ: 152.3, 141.3, 132.4, 130.4, 129.4, 126.7, 118.9, 110.8, 82.7, 47.8, 28.1;

**IR** (KBr, cm<sup>-1</sup>): 2979, 2933, 2223, 1724, 1682, 1338, 1226, 1143, 1122;

Anal. Calcd. for C<sub>20</sub>H<sub>26</sub>N<sub>2</sub>O<sub>4</sub>: C, 67.02; H, 7.31; Found: C, 67.11; H, 7.22.

**3i.**

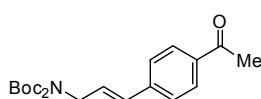

5 h, pale yellow liquid, yield: 70 %.

**<sup>1</sup>H NMR** (400 MHz, CDCl<sub>3</sub>) δ: 7.90 (d, *J* = 8.0 Hz, 2H), 7.43 (d, *J* = 8.0 Hz, 2H), 6.56 (d, *J* = 16.0 Hz, 1H), 6.36 (dt, *J* = 16.0 Hz, *J* = 6.0 Hz, 1H), 4.36 (d, *J* = 5.2 Hz, 2H), 2.58 (s, 3H), 1.51 (s, 18H);  
**<sup>13</sup>C NMR** (100 MHz, CDCl<sub>3</sub>) δ: 197.4, 152.3, 141.4, 136.1, 131.0, 128.7, 128.3, 126.4, 82.6, 48.0, 28.1, 26.5;  
**IR** (neat, cm<sup>-1</sup>): 2979, 2933, 1747, 1685, 1602, 1367, 1267, 1224, 1145, 1118;  
Anal. Calcd. for C<sub>21</sub>H<sub>29</sub>NO<sub>5</sub>: C, 67.18; H, 7.79; Found: C, 67.26; H, 7.87.

**3j.**

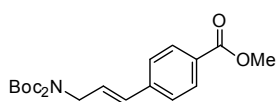

6 h, white solid, mp 77-78 °C, yield: 67 %.

**<sup>1</sup>H NMR** (400 MHz, CDCl<sub>3</sub>) δ: 7.99 (d, *J* = 8.4 Hz, 2H), 7.42 (d, *J* = 8.4 Hz, 2H), 6.57 (d, *J* = 16.0 Hz, 1H), 6.36 (dt, *J* = 16.0 Hz, *J* = 6.0 Hz, 1H), 4.37 (d, *J* = 6.0 Hz, 2H), 3.92 (s, 3H), 1.52 (s, 18H);

**<sup>13</sup>C NMR** (100 MHz, CDCl<sub>3</sub>) δ: 166.8, 152.3, 141.3, 131.2, 129.9, 129.0, 128.0, 126.3, 82.6, 52.0, 48.0, 28.1;

**IR** (KBr, cm<sup>-1</sup>): 2979, 2933, 2223, 1718, 1689, 1367, 1353, 1282, 1232, 1149, 1108;

Anal. Calcd. for C<sub>21</sub>H<sub>29</sub>NO<sub>6</sub>: C, 64.43; H, 7.47; Found: C, 64.36; H, 7.31.

**3k.**

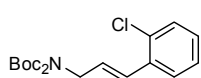

4 h, orange liquid, yield: 83 %.

**<sup>1</sup>H NMR** (400 MHz, CDCl<sub>3</sub>) δ: 7.52 (dd, *J* = 7.6 Hz, *J* = 1.6 Hz, 1H), 7.34 (dd, *J* = 8.0 Hz, *J* = 1.6 Hz, 1H), 7.22-7.17 (m, 2H), 6.93 (d, *J* = 16.0 Hz, 1H), (dt, *J* = 16.0 Hz, *J* = 6.0 Hz, 1H), 4.38 (dd, *J* = 6.0 Hz, *J* = 1.2 Hz, 2H), 1.54 (s, 18H);

**<sup>13</sup>C NMR** (100 MHz, CDCl<sub>3</sub>) δ: 152.2, 134.9, 133.0, 129.6, 128.6, 128.4, 128.0, 126.9, 126.8, 82.5, 48.0, 28.1;

**IR** (neat, cm<sup>-1</sup>): 2979, 2933, 1747, 1697, 1367, 1351, 1224, 1147, 1109, 752;

Anal. Calcd. for C<sub>19</sub>H<sub>26</sub>ClNO<sub>4</sub>: C, 62.03; H, 7.12; Found: C, 61.95; H, 7.00.

**3l.**

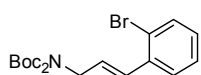

4 h, yellow liquid, yield: 74 %.

**<sup>1</sup>H NMR** (400 MHz, CDCl<sub>3</sub>) δ: 7.54-7.49 (m, 2H), 7.26 (t, *J* = 7.6 Hz, 1H), 7.09 (d, *J* = 8.0 Hz, 1H), 6.88 (d, *J* = 15.6 Hz, 1H), 6.19 (dt, *J* = 16.0 Hz, *J* = 6.0 Hz, 1H), 4.37 (d, *J* = 5.6 Hz, 2H), 1.54 (s, 18H);

**<sup>13</sup>C NMR** (100 MHz, CDCl<sub>3</sub>) δ: 152.2, 136.6, 132.9, 130.9, 128.9, 128.2, 127.5, 127.1, 123.5, 82.5, 48.0, 28.1;

**IR** (neat, cm<sup>-1</sup>): 2979, 2933, 1747, 1697, 1465, 1434, 1384, 1367, 1351, 1145, 1120;

Anal. Calcd. for C<sub>19</sub>H<sub>26</sub>BrNO<sub>4</sub>: C, 55.35; H, 6.36; Found: C, 55.43; H, 6.26.

**3m.**

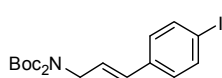

4 h, white solid, mp 68-69 °C, yield: 63 %.

**<sup>1</sup>H NMR** (400 MHz, CDCl<sub>3</sub>) δ: 7.63 (d, *J* = 8.4 Hz, 2H), 7.10 (d, *J* = 8.4 Hz, 2H), 6.45 (d, *J* = 16.0 Hz, 1H), 6.22 (dt, *J* = 16.0 Hz, *J* = 6.4 Hz, 1H), 4.32 (d, *J* = 6.4 Hz, 2H), 1.52 (s, 18H);

**<sup>13</sup>C NMR** (100 MHz, CDCl<sub>3</sub>) δ: 152.4, 137.6, 136.3, 131.1, 128.2, 126.2, 92.8, 82.5, 48.0, 28.1;

**IR** (KBr, cm<sup>-1</sup>): 2977, 2931, 1737, 1695, 1350, 1232, 1149, 1122;

Anal. Calcd. for C<sub>19</sub>H<sub>26</sub>INO<sub>4</sub>: C, 49.68; H, 5.71; Found: C, 49.55; H, 5.66.

**3n.**

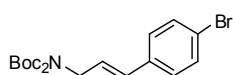

3 h, white solid, mp 64-65 °C, yield: 63 %.

**<sup>1</sup>H NMR** (400 MHz, CDCl<sub>3</sub>) δ: 7.42 (d, *J* = 8.0 Hz, 2H), 7.22 (d, *J* = 8.4 Hz, 2H), 6.47 (d, *J* = 16.0 Hz, 1H), 6.22 (dt, *J* = 16.0 Hz, *J* = 6.0 Hz, 1H), 4.32 (d, *J* = 6.0 Hz, 2H), 1.52 (s, 18H);

**<sup>13</sup>C NMR** (100 MHz, CDCl<sub>3</sub>) δ: 152.4, 135.7, 131.6, 131.0, 127.9, 126.0, 121.3, 82.4, 48.0, 28.1;

**IR** (KBr, cm<sup>-1</sup>): 2979, 2931, 1739, 1695, 1348, 1234, 1149, 1124;

Anal. Calcd. for C<sub>19</sub>H<sub>26</sub>BrNO<sub>4</sub>: C, 55.35; H, 6.36; Found: C, 55.26; H, 6.28.

**3o.**

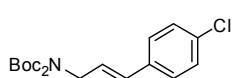

4 h, white solid, mp 51-52 °C, yield: 77 %.

<sup>1</sup>H NMR (400 MHz, CDCl<sub>3</sub>) δ: 7.28 (m, 4H), 6.48 (d, *J* = 16.0 Hz, 1H), 6.20 (dt, *J* = 15.6 Hz, *J* = 6.4 Hz, 1H), 4.33 (d, *J* = 6.4 Hz, 2H), 1.52 (s, 18H);

<sup>13</sup>C NMR (100 MHz, CDCl<sub>3</sub>) δ: 152.4, 135.3, 133.2, 131.0, 128.7, 127.6, 125.9, 82.5, 48.0, 28.1;

IR (KBr, cm<sup>-1</sup>): 2979, 2933, 1735, 1695, 1350, 1234, 1149, 1122;

Anal. Calcd. for C<sub>19</sub>H<sub>26</sub>ClNO<sub>4</sub>: C, 62.03; H, 7.12; Found: C, 62.11; H, 7.01.

## 4. Compounds 5a – 5e.

**General procedure:** an oven-dried Schlenk tube equipped with a magnetic stirring bar was charged under argon with 2-(alkynyl)trifluoroacetanilide (1 equiv), allylbromide (1.5 equiv), K<sub>2</sub>CO<sub>3</sub> (1.2 eq.), and anhydrous DMF (0.3 M). The tube was sealed and stirred at room temperature for the indicated period of time. Then, the reaction mixture was diluted with Et<sub>2</sub>O, washed twice with H<sub>2</sub>O, and with a saturated NaCl solution. The organic phase was separated, dried over Na<sub>2</sub>SO<sub>4</sub>, filtered, and concentrated under reduced pressure. The residue was purified by chromatography on silica gel, eluting with a *n*-hexane/AcOEt mixture.

### 5a. (Known compound)<sup>1</sup>

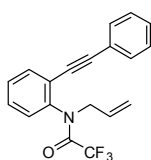

4 h, pale yellow liquid, yield: 89 %.

<sup>1</sup>H NMR (400 MHz, CDCl<sub>3</sub>) δ: 7.64 (m, 1H), 7.50 (m, 2H), 7.41 (m, 5H), 7.24 (m, 1H), 5.93 (m, 1H), 5.19 (m, 2H), 4.91 (dd, *J* = 14.4 Hz, *J* = 5.7 Hz, 1H), 4.01 (dd, *J* = 14.4 Hz, *J* = 7.6 Hz, 1H).

### 5b.

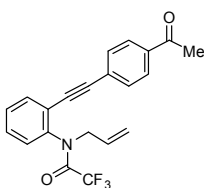

10 min, pale yellow liquid, yield: 90 %.

<sup>1</sup>H NMR (400 MHz, CDCl<sub>3</sub>) δ: 7.95 (d, *J* = 8.4 Hz, 2H), 7.66-7.64 (m, 1H), 7.57 (d, *J* = 8.4 Hz, 1H), 7.44-7.42 (m, 2H), 7.26 (m, 1H), 5.90 (m, 1H), 5.19 (m, 2H), 4.87 (dd, *J* = 14.4 Hz, *J* = 5.6 Hz, 1H), 3.99 (dd, *J* = 14.8 Hz, *J* = 7.6 Hz, 1H), 2.62 (s, 3H);

<sup>13</sup>C NMR (100 MHz, CDCl<sub>3</sub>) δ: 197.1, 157.0 (q, *J* = 36.8 Hz), 132.9, 131.7, 130.7, 129.7, 129.4, 129.2, 128.3, 127.0, 122.9, 120.1, 116.2 (q, *J* = 288.6 Hz), 94.4, 87.7, 53.7, 26.5;

IR (neat, cm<sup>-1</sup>): 3072, 3004, 2927, 1687, 1602, 1484, 1452, 1403, 1359, 1265, 1187, 1155, 838, 755;

MS *m/z*: 274 (100), 344 (76), 232 (56), 246 (40), 190 (40), 302 (29), 371 (M<sup>+</sup>, 20);

Anal. Calcd. for C<sub>21</sub>H<sub>16</sub>F<sub>3</sub>NO<sub>2</sub>: C, 67.92; H, 4.34; Found: C, 67.82; H, 4.26.

### 5c.

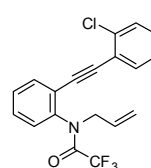

3 h, pale yellow liquid, yield: 83 %.

<sup>1</sup>H NMR (400 MHz, CDCl<sub>3</sub>) δ: 7.69 (m, 1H), 7.54 (m, 1H), 7.43 (m, 3H), 7.32-7.23 (m, 3H), 5.92 (m, 1H), 5.19 (dd, *J* = 17.2 Hz, *J* = 10.0 Hz, 2H), 4.98 (dd, *J* = 14.4 Hz, *J* = 6.0 Hz, 1H), 3.98 (dd, *J* = 14.4 Hz, *J* = 7.6 Hz, 1H);

<sup>13</sup>C NMR (100 MHz, CDCl<sub>3</sub>) δ: 156.8 (q, *J* = 36.8 Hz), 139.9, 136.0, 133.4, 133.2, 130.8, 130.0, 130.0, 129.4, 129.2, 129.1, 126.6, 123.0, 122.4, 120.1, 116.3 (q, *J* =

288.6 Hz), 92.0, 89.6, 53.6;

IR (neat, cm<sup>-1</sup>): 3074, 2931, 1701, 1492, 1471, 1452, 1438, 1207, 1190, 1155, 756;

MS *m/z*: 336 (100), 226 (85), 69 (79), 190 (61), 230 (59), 294 (59), 266 (53), 363 (M<sup>+</sup>, 43);

Anal. Calcd. for C<sub>19</sub>H<sub>13</sub>ClF<sub>3</sub>NO: C, 62.73; H, 3.60; Found: C, 62.65; H, 3.51.

### 5d.

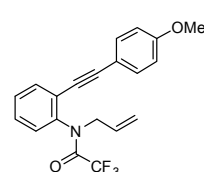

12 h, pale yellow liquid, yield: 91 %.

<sup>1</sup>H NMR (400 MHz, CDCl<sub>3</sub>) δ: 7.60 (m, 1H), 7.46-7.34 (m, 4H), 7.22 (d, *J* = 7.6 Hz, 1H), 7.91 (d, *J* = 8.8 Hz, 2H), 5.93 (m, 1H), 5.19 (m, 2H), 4.90 (dd, *J* = 14.4 Hz, *J* = 5.6 Hz, 3H), 3.99 (dd, *J* = 14.8 Hz, *J* = 7.6 Hz, 1H), 3.85 (s, 1H);

**<sup>13</sup>C NMR** (100 MHz, CDCl<sub>3</sub>) δ: 160.2, 157.1 (q, *J* = 37.6 Hz), 139.8, 133.2, 132.5, 130.9, 129.6, 129.1, 128.3, 123.8, 119.9, 116.3 (q, *J* = 288.6 Hz), 114.4, 114.2, 95.8, 83.6, 55.3, 53.5;  
**IR** (neat, cm<sup>-1</sup>): 2935, 2840, 1697, 1606, 1512, 1454, 1251, 1205, 1188, 1155, 1030, 833;  
**MS** *m/z*: 359 (M<sup>+</sup>, 100), 262 (68), 290 (60), 235 (55), 332 (52);  
 Anal. Calcd. for C<sub>20</sub>H<sub>16</sub>F<sub>3</sub>NO<sub>2</sub>: C, 66.85; H, 4.49; Found: C, 66.72; H, 4.40.

**5e.**

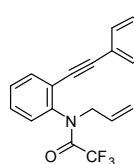

4 h, pale yellow liquid, yield: 88 %.

**<sup>1</sup>H NMR** (400 MHz, CDCl<sub>3</sub>) δ: 7.63 (m, 1H), 7.62-7.40 (m, 6H), 7.24 (m, 1H), 5.89 (m, 1H), 5.20 (m, 2H), 4.88 (dd, *J* = 14.4 Hz, *J* = 6.0 Hz, 1H), 3.99 (dd, *J* = 14.4 Hz, *J* = 7.2 Hz, 1H);

**<sup>13</sup>C NMR** (100 MHz, CDCl<sub>3</sub>) δ: 157.1 (q, *J* = 37.6 Hz), 140.1, 135.1, 132.9, 132.8, 130.7, 129.7, 129.2, 129.0, 128.9, 123.2, 120.8, 120.1, 116.3 (q, *J* = 288.6 Hz),

94.3, 85.6, 53.6;

**IR** (neat, cm<sup>-1</sup>): 3085, 2929, 1701, 1494, 1452, 1207, 1190, 1155, 1091, 829, 758;

**MS** *m/z*: 336 (100), 266 (82), 190 (66), 294 (65), 253 (58), 328 (58), 231 (54), 363 (M<sup>+</sup>, 54);

Anal. Calcd. for C<sub>19</sub>H<sub>13</sub>ClF<sub>3</sub>NO: C, 62.73; H, 3.60; Found: C, 62.62; H, 3.49.

## 5. Indoles 7a – 7d.

**General procedure:** an oven-dried Schlenk tube equipped with a magnetic stirring bar was charged under argon with arenediazonium salt (0.275 mmol), 2-alkynyl-*N*-(allyl)trifluoroacetanilide (0.25 mmol), Pd<sub>2</sub>(dba)<sub>3</sub> (0.005 mmol), sodium acetate (0.75 mmol) and anhydrous MeCN (2.5 mL). The tube was protected from light with aluminum film, sealed, and stirred at room temperature for the indicated time. Then, K<sub>2</sub>CO<sub>3</sub> (0.5 mmol) and PPh<sub>3</sub> (0.04 mmol) were added. The tube was sealed and stirred at 100 °C for the indicated time. The reaction was diluted with Et<sub>2</sub>O, washed twice with H<sub>2</sub>O, and with a saturated NaCl solution. The organic phase was separated, dried over Na<sub>2</sub>SO<sub>4</sub>, filtered, and concentrated under reduced pressure. The residue was purified by chromatography on silica gel, eluting with a *n*-hexane/AcOEt mixture.

**7a.** (Known compound)<sup>1</sup>

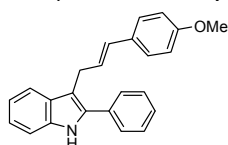

2 + 8 h, yellow solid, yield: 68 %.

**<sup>1</sup>H NMR** (400 MHz, CDCl<sub>3</sub>) δ: 8.13 (bs, 1H), 7.72 (d, *J* = 8.0 Hz, 1H), 7.64 (d, *J* = 7.6 Hz, 2H), 7.52 (t, *J* = 7.6 Hz, 2H), 7.44 (m, 2H), 7.30 (m, 3H), 7.21 (t, *J* = 7.6 Hz, 1H), 6.87 (d, *J* = 8.8 Hz, 2H), 6.46 (m, 2H), 3.80 (m, 5H).

**7b.**

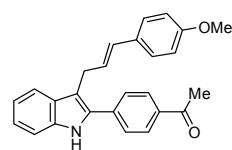

1.5 + 12 h, yellow solid, mp 146-147 °C, yield: 79 %.

**<sup>1</sup>H NMR** (400 MHz, CDCl<sub>3</sub>) δ: 8.32 (bs, 1H), 8.06 (d, *J* = 8.4 Hz, 2H), 7.70 (m, 3H), 7.45 (d, *J* = 8.0 Hz, 1H), 7.28 (m, 3H), 7.18 (t, *J* = 7.2 Hz, 1H), 6.84 (d, *J* = 8.8 Hz, 2H), 6.41 (m, 2H), 3.81 (m, 5H), 2.66 (s, 3H);

**<sup>13</sup>C NMR** (100 MHz, CDCl<sub>3</sub>) δ: 197.5, 158.9, 137.5, 136.4, 135.8, 133.5, 130.4, 129.9, 129.4, 129.0, 127.2, 126.9, 123.2, 120.1, 119.8, 113.9, 112.8, 111.0, 55.3, 28.2, 26.6;

**IR** (KBr, cm<sup>-1</sup>): 3336, 1672, 1604, 1510, 1261;

Anal. Calcd. for C<sub>26</sub>H<sub>23</sub>NO<sub>2</sub>: C, 81.86; H, 6.08; Found: C, 81.69; H, 6.12.

**7c.**

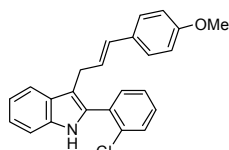

1 + 12 h, yellow wax, yield: 88 %.

**<sup>1</sup>H NMR** (400 MHz, CDCl<sub>3</sub>) δ: 8.22 (bs, 1H), 7.74 (d, *J* = 8.0 Hz, 1H), 7.54 (m, 2H), 7.38 (m, 3H), 7.28 (m, 3H), 7.18 (t, *J* = 7.2 Hz, 1H), 6.84 (d, *J* = 8.8 Hz, 2H), 6.41 (d, *J* = 16.0 Hz, 1H), 6.30 (dt, *J* = 15.6 Hz, *J* = 6.0 Hz, 1H), 3.82 (m, 3H), 3.68 (d, *J* = 5.6 Hz, 2H);

**<sup>13</sup>C NMR** (100 MHz, CDCl<sub>3</sub>) δ: 158.7, 135.9, 133.9, 132.7, 132.1, 131.7, 130.7, 130.1, 129.6, 128.3, 127.3, 127.2, 126.8, 122.5, 119.8, 119.6, 113.9, 112.7, 110.9, 55.3, 28.4;

**IR** (neat, cm<sup>-1</sup>): 3407, 3056, 2931, 1606, 1510, 1454, 1245, 1035, 744;

**MS**  $m/z$ : 373 ( $M^+$ , 100), 121 (61), 375 (35), 217 (35), 234 (29);  
Anal. Calcd. for  $C_{24}H_{20}ClNO$ : C, 77.10; H, 5.39; Found: C, 76.99; H, 5.45.

**7d.** (Known compound)<sup>1</sup>

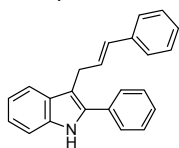

0.5 + 12 h, yellow waxy solid, yield: 81 %.

**<sup>1</sup>H NMR** (400 MHz,  $CDCl_3$ )  $\delta$ : 8.13 (bs, 1H), 7.71 (d,  $J$  = 8.0 Hz, 1H), 7.64 (d,  $J$  = 7.2 Hz, 2H), 7.53 (t,  $J$  = 7.6 Hz, 2H), 7.46-7.18 (m, 9H), 6.63-6.50 (m, 2H), 3.86 (d,  $J$  = 4.8 Hz, 2H).

## 6. Indoles 7e – 7h.

**General procedure:** an oven-dried Schlenk tube equipped with a magnetic stirring bar was charged under argon with arenediazonium salt (0.275 mmol), 2-alkynyl-*N*-(allyl) trifluoroacetanilide (0.25 mmol),  $Pd_2(dba)_3$  (0.005 mmol),  $CaCO_3$  (0.375 mmol), and anhydrous MeOH (2.5 mL). The tube was protected from light with aluminum film, sealed, and stirred at room temperature for the indicated period of time. Then, the solvent was evaporated under reduced pressure and  $K_2CO_3$  (0.5 mmol),  $PPh_3$  (0.04 mmol), and anhydrous MeCN (2.5 mL) were added. The tube was sealed and stirred at 100 °C for the indicated period of time. The reaction was diluted with  $Et_2O$ , washed twice with  $H_2O$ , and with a saturated NaCl solution. The organic phase was separated, dried over  $Na_2SO_4$ , filtered, and concentrated under reduced pressure. The residue was purified by chromatography on silica gel, eluting with an *n*-hexane/AcOEt mixture.

**7e.**

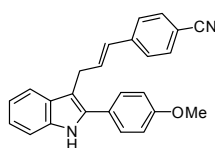

2 + 12 h, yellow waxy solid, yield: 69 %.

**<sup>1</sup>H NMR** (400 MHz,  $CDCl_3$ )  $\delta$ : 8.19 (bs, 1H), 7.61 (d,  $J$  = 8.0 Hz, 1H), 7.56-7.50 (m, 4H), 7.42 (m, 3H), 7.25 (t,  $J$  = 6.8 Hz, 1H), 7.16 (t,  $J$  = 7.2 Hz, 1H), 7.03 (d,  $J$  = 8.8 Hz, 2H), 6.68 (dt,  $J$  = 16.0 Hz,  $J$  = 6.0 Hz, 1H), 6.46 (d,  $J$  = 16.0 Hz, 1H), 3.89 (s, 3H), 3.82 (d,  $J$  = 6.0 Hz, 2H);

**<sup>13</sup>C NMR** (100 MHz,  $CDCl_3$ )  $\delta$ : 159.4, 142.3, 135.8, 135.2, 134.2, 132.3, 129.3, 129.2, 128.8, 126.6, 125.3, 122.2, 119.8, 119.1, 119.0, 114.4, 110.8, 110.0, 108.8, 55.4, 28.3;

**IR** (KBr,  $cm^{-1}$ ): 3394, 3033, 2925, 2837, 2225, 1602, 1508, 1458, 1250, 1176, 835, 744;

**MS**  $m/z$ : 364 ( $M^+$ , 100), 236 (49), 363 (32), 365 (30);

Anal. Calcd. for  $C_{25}H_{20}N_2O$ : C, 82.39; H, 5.35; Found: C, 82.27; H, 5.26.

**7f.**

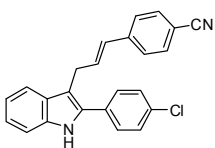

1 + 6 h, yellow waxy solid, yield: 72 %.

**<sup>1</sup>H NMR** (400 MHz,  $CDCl_3$ )  $\delta$ : 8.24 (bs, 1H), 7.63 (d,  $J$  = 8.0 Hz, 1H), 7.56-7.38 (m, 9H), 7.28 (t,  $J$  = 8.0 Hz, 1H), 7.18 (t,  $J$  = 7.6 Hz, 1H), 6.67 (dt,  $J$  = 16.0 Hz,  $J$  = 6.0 Hz, 1H), 6.44 (d,  $J$  = 16.0 Hz, 1H), 3.83 (d,  $J$  = 5.6 Hz, 2H);

**<sup>13</sup>C NMR** (100 MHz,  $CDCl_3$ )  $\delta$ : 142.1, 136.1, 134.0, 133.9, 133.7, 132.3, 131.2, 129.2, 129.1, 129.1, 129.0, 126.6, 122.9, 120.1, 119.3, 119.1, 111.1, 110.1, 110.1, 28.3;

**IR** (KBr,  $cm^{-1}$ ): 3398, 3057, 2923, 2225, 1602, 1485, 1456, 1093, 833, 742, 547;

**MS**  $m/z$ : 368 ( $M^+$ , 100), 240 (49), 217 (36), 369 (32), 370 (31), 204 (31);

Anal. Calcd. for  $C_{24}H_{17}ClN_2$ : C, 78.15; H, 4.65; Found: C, 78.08; H, 4.51.

**7g.**

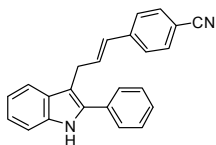

1 + 10 h, orange waxy solid, yield: 73 %.

**<sup>1</sup>H NMR** (400 MHz,  $CDCl_3$ )  $\delta$ : 8.25 (bs, 1H), 7.66-7.38 (m, 11H), 7.28 (dt,  $J$  = 8.0 Hz,  $J$  = 1.2 Hz, 1H), 7.19 (t,  $J$  = 7.2 Hz, 1H), 6.41 (dt,  $J$  = 16.0 Hz,  $J$  = 6.0 Hz, 1H), 6.48 (d,  $J$  = 16.0 Hz, 1H), 3.87 (d,  $J$  = 5.6 Hz,  $J$  = 1.6 Hz, 2H);

**<sup>13</sup>C NMR** (100 MHz,  $CDCl_3$ )  $\delta$ : 142.3, 136.0, 135.2, 134.0, 132.9, 132.8, 132.3, 129.2, 129.0, 128.9, 127.9, 126.6, 122.5, 119.9, 119.2, 119.1, 111.0, 110.0, 109.6, 28.3;

**IR** (KBr,  $cm^{-1}$ ): 3396, 3056, 2923, 2225, 1602, 1450, 744, 689;

**MS**  $m/z$ : 334 ( $M^+$ , 100), 206 (51), 218 (46), 333 (26);

Anal. Calcd. for  $C_{24}H_{18}N_2$ : C, 86.20; H, 5.43; Found: C, 86.06; H, 5.40.

7h.

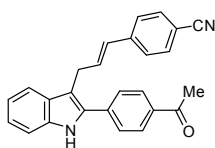

1 + 12 h, yellow solid, mp 182-183 °C, yield: 73 %.

<sup>1</sup>H NMR (400 MHz, CDCl<sub>3</sub>) δ: 8.33 (bs, 1H), 7.08 (d, *J* = 8.4 Hz, 2H), 7.69 (d, *J* = 8.4 Hz, 2H), 7.65 (d, *J* = 8.0 Hz, 1H), 7.56 (d, *J* = 8.0 Hz, 2H), 7.47 (d, *J* = 8.4 Hz, 1H), 7.40 (d, *J* = 8.4 Hz, 2H), 7.32 (m, 1H), 7.19 (t, *J* = 7.6 Hz, 1H), 6.69 (dt, *J* = 16.0 Hz, *J* = 6.0 Hz, 1H), 6.46 (d, *J* = 16.0 Hz, 1H), 3.88 (d, *J* = 5.6 Hz, *J* = 1.6 Hz, 2H), 2.66 (s, 3H);

<sup>13</sup>C NMR (100 MHz, CDCl<sub>3</sub>) δ: 197.4, 142.0, 137.3, 136.4, 136.0, 133.8, 133.4, 132.3, 129.2, 129.2, 129.0, 127.6, 126.6, 123.4, 120.3, 119.5, 119.0, 111.5, 111.1, 110.3, 28.3, 26.6;

IR (KBr, cm<sup>-1</sup>): 3352, 2923, 2221, 1668, 1603, 1275;

Anal. Calcd. for C<sub>26</sub>H<sub>20</sub>N<sub>2</sub>O: C, 82.95; H, 5.35; Found: C, 82.88; H, 5.42.

## 7. One-pot synthesis of 12.

**General procedure:** an oven-dried Schlenk tube equipped with a magnetic stirring bar was charged under argon with benzenediazonium tetrafluoroborate (52.8 mg, 0.25 mmol), 2-iodo-*N*-(allyl)trifluoroacetanilide (88.8 mg, 0.275 mmol), Pd<sub>2</sub>(dba)<sub>3</sub> (4.6 mg, 0.005 mmol), CaCO<sub>3</sub> (61.5 mg, 0.75 mmol), and anhydrous MeCN (2.5 mL). The tube was protected from light with aluminum film, sealed, and stirred at room temperature for 1 h. Then, the solvent was evaporated under reduced pressure and Pd(OAc)<sub>2</sub> (2.8 mg, 0.0125 mmol), P(*o*-tol)<sub>3</sub> (15.2 mg, 0.05 mmol), Et<sub>3</sub>N (174 μL, 1.25 mmol), and anhydrous MeCN (2.5 mL) were added. The tube was sealed and stirred at 80 °C overnight. The reaction was diluted with Et<sub>2</sub>O, washed twice with H<sub>2</sub>O, and with a saturated NaCl solution. The organic phase was separated, dried over Na<sub>2</sub>SO<sub>4</sub>, filtered, and concentrated under reduced pressure. The residue was purified by chromatography on silica gel, eluting with a *n*-hexane/AcOEt 90/10 v/v.

10.

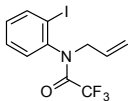

<sup>1</sup>H NMR (400 MHz, CDCl<sub>3</sub>) δ: 7.96 (d, *J* = 7.6 Hz, 1H), 7.40 (t, *J* = 7.6 Hz, 1H), 7.21 (d, *J* = 7.6 Hz, 1H), 7.13 (t, *J* = 7.6 Hz, 1H), 5.93-5.83 (m, 1H), 5.22 (d, *J* = 10.0 Hz, 1H), 5.15 (d, *J* = 16.8 Hz, 1H), 4.96 (dd, *J* = 14.4 Hz, *J* = 5.6 Hz, 1H), 3.61 (dd, *J* = 14.4 Hz, *J* = 8.0 Hz, 1H);

<sup>13</sup>C NMR (100 MHz, CDCl<sub>3</sub>) δ: 153.4 (q, *J* = 36.8 Hz), 140.9, 140.1, 131.0, 130.7, 130.2, 128.8, 120.6, 116.0 (q, *J* = 288.5 Hz), 99.5, 53.3;

IR (neat, cm<sup>-1</sup>): 3085, 2931, 1700, 1471, 1438, 1411, 1211, 1187, 1155, 727;

Anal. Calcd. for C<sub>11</sub>H<sub>9</sub>F<sub>3</sub>INO: C, 37.21; H, 2.55; Found: C, 37.10; H, 2.27.

12.

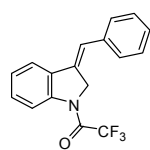

1 + 12 h, white solid, mp 147-148 °C, yield: 50 %.

<sup>1</sup>H NMR (400 MHz, CDCl<sub>3</sub>) δ: 8.35 (d, *J* = 8.4 Hz, 1H), 7.65 (d, *J* = 7.6 Hz, 1H), 7.47 (d, *J* = 7.6 Hz, 2H), 7.38-7.24 (m, 5H), 6.97 (t, *J* = 2.8 Hz, 1H), 5.15 (d, *J* = 2.8 Hz, 2H);

<sup>13</sup>C NMR (100 MHz, CDCl<sub>3</sub>) δ: 153.7 (q, *J* = 38.5 Hz), 142.8, 136.0, 131.5, 131.3, 129.9, 129.0, 128.3, 127.6, 126.1, 119.9, 119.1, 118.3, 116.0 (q, *J* = 288.1 Hz), 52.5;

IR (KBr, cm<sup>-1</sup>): 2925, 1693, 1467, 1434, 1234, 1199, 1151, 1095, 763, 690;

MS *m/z*: 69 (100), 303 (M<sup>+</sup>, 99), 206 (47), 226 (45), 204 (31), 302 (31), 178 (22);

Anal. Calcd. for C<sub>17</sub>H<sub>12</sub>F<sub>3</sub>NO: C, 67.32; H, 3.99; Found: C, 67.21; H, 4.09.

## 8. References.

- 1) Cacchi S., Fabrizi G., Pace P. *J. Org. Chem.* **1998**, 63, 1001-1011.
- 2) Roe A. *Org. React.* **1949**, 5, 193.
- 3) Arcadi A., Bernocchi E., Cacchi S., Caglioti L., Marinelli F. *Tetrahedron Lett.* **1990**, 31, 2463-2466.
- 4) Donnell R. D., Rein T., Åkermark B., Helquist P. *J. Org. Chem.* **1988**, 53, 3845-3849.



**9. Copy of  $^1\text{H}$  and  $^{13}\text{C}$  spectra.**

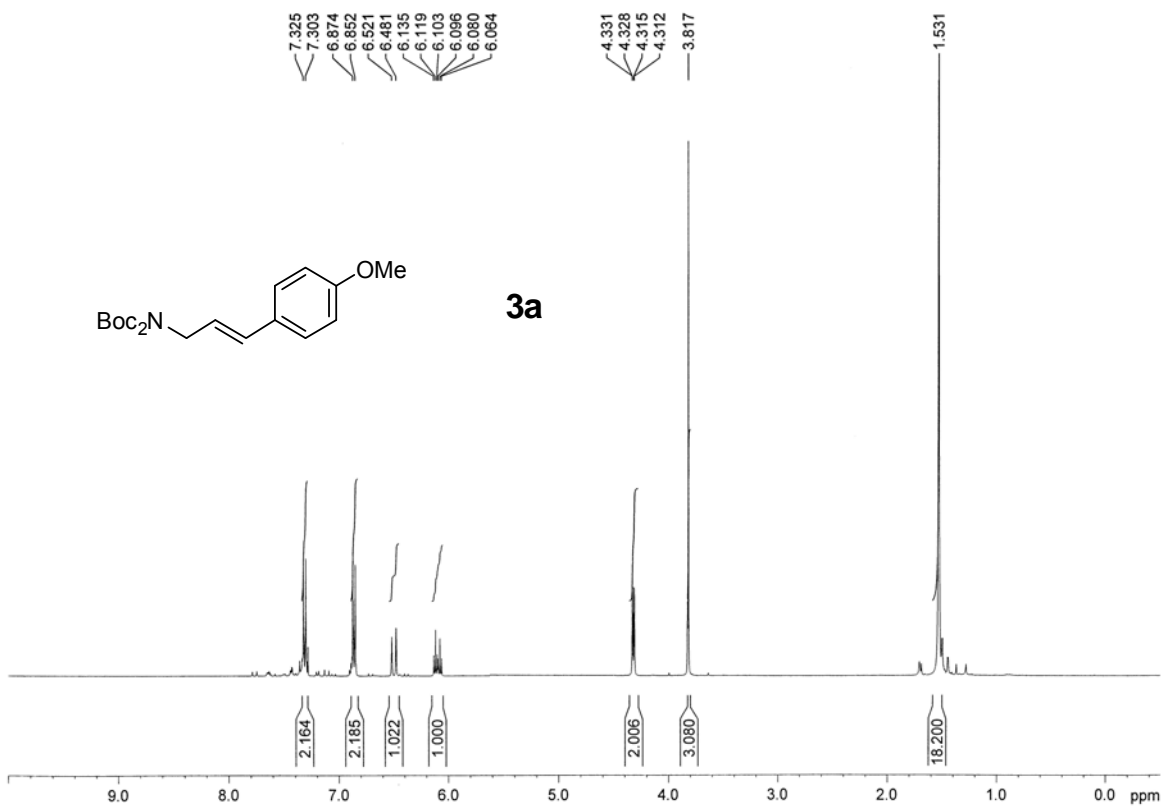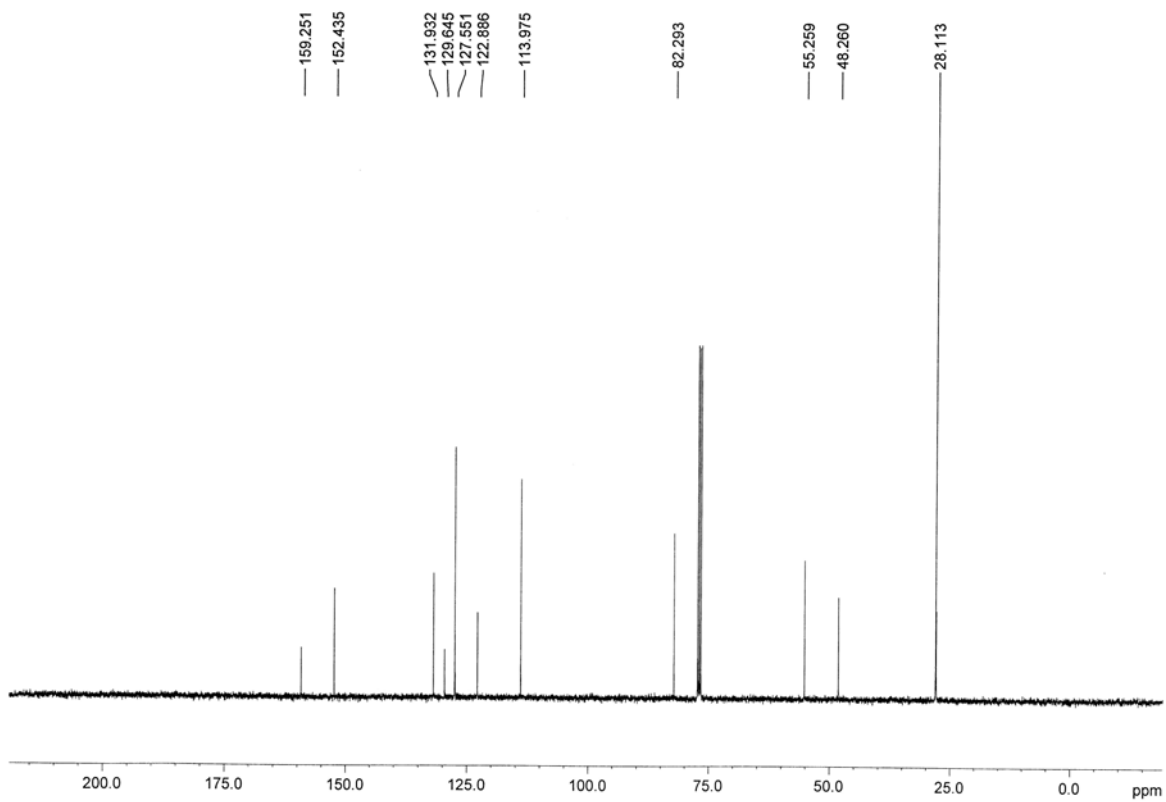

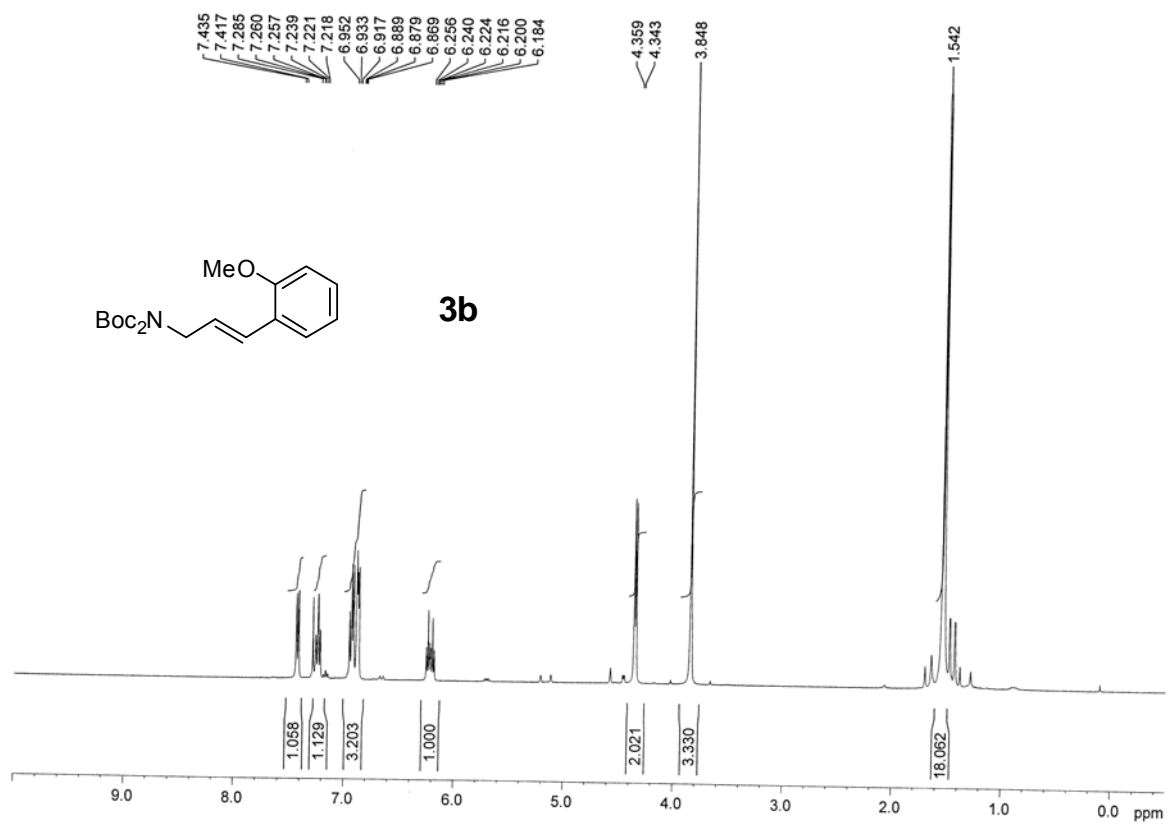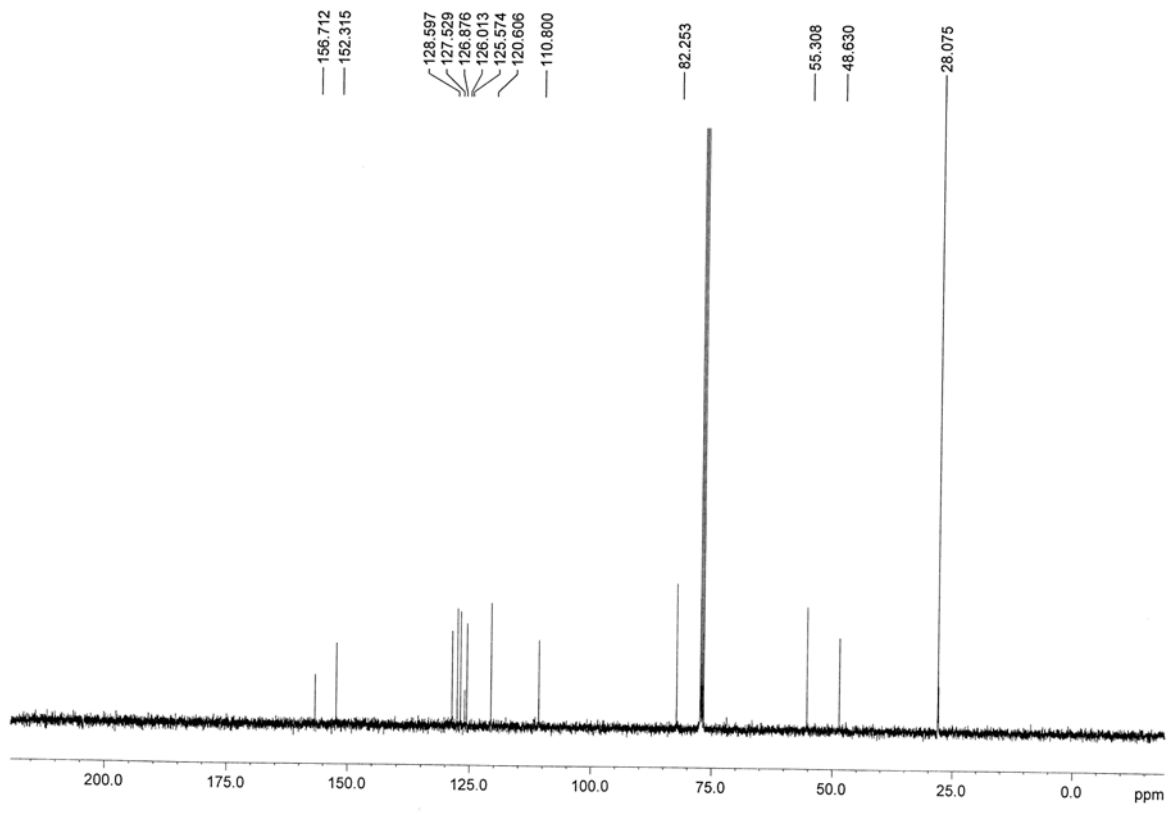

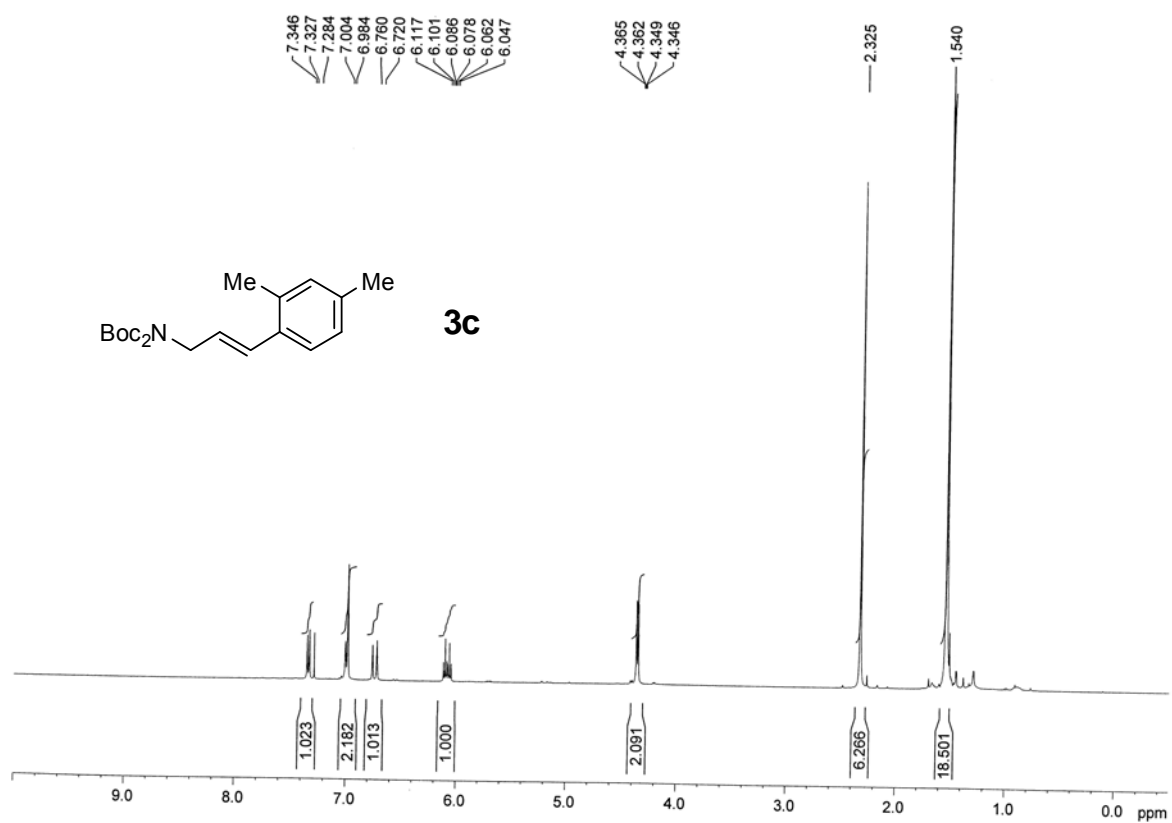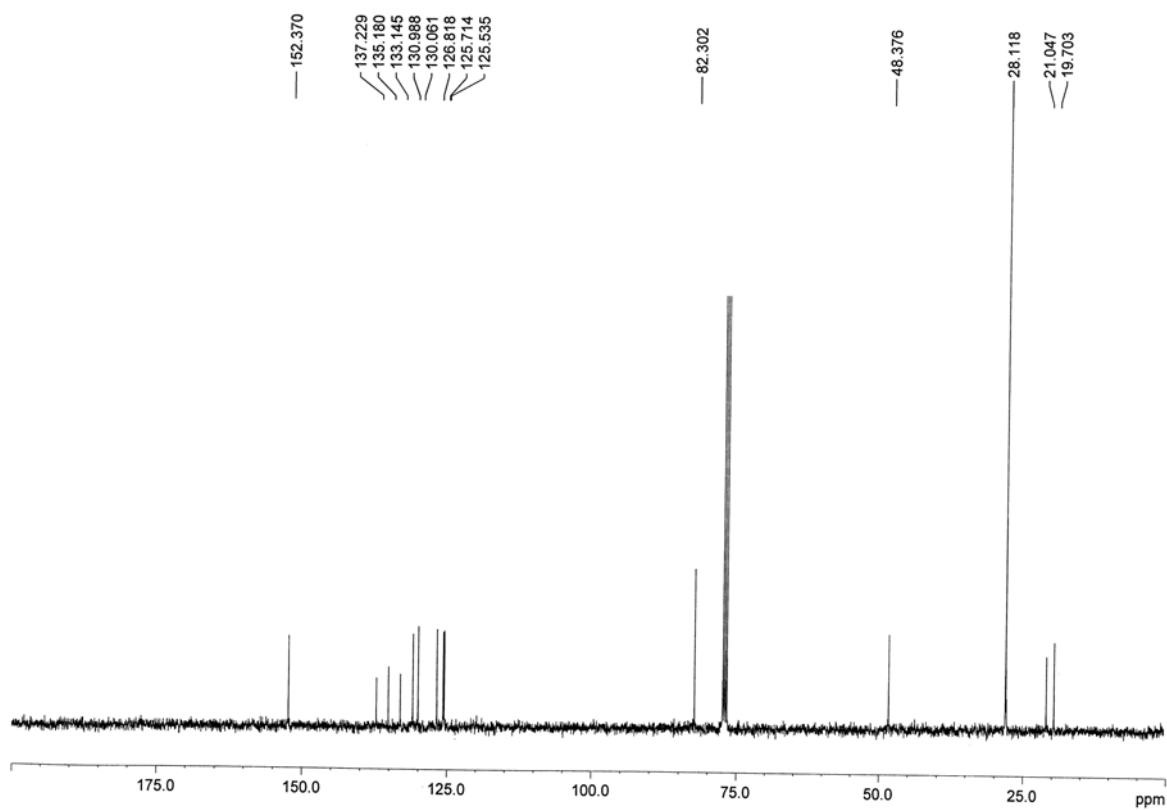

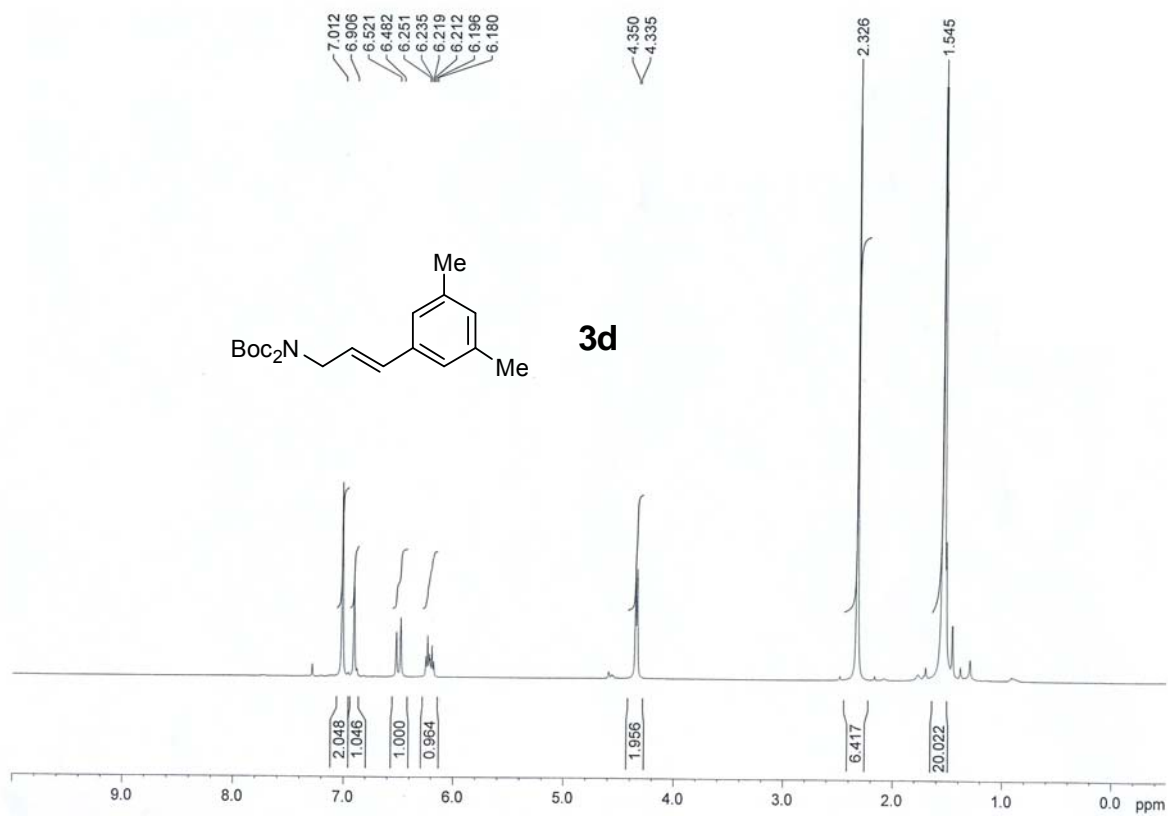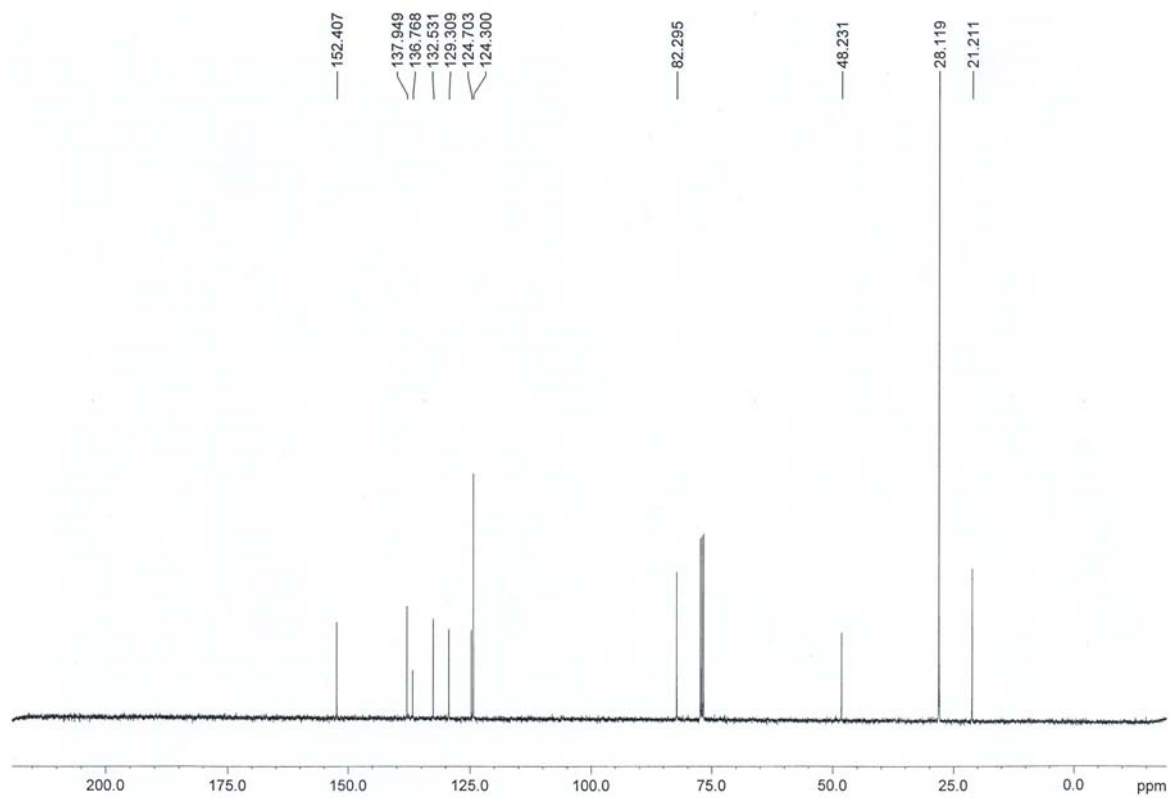

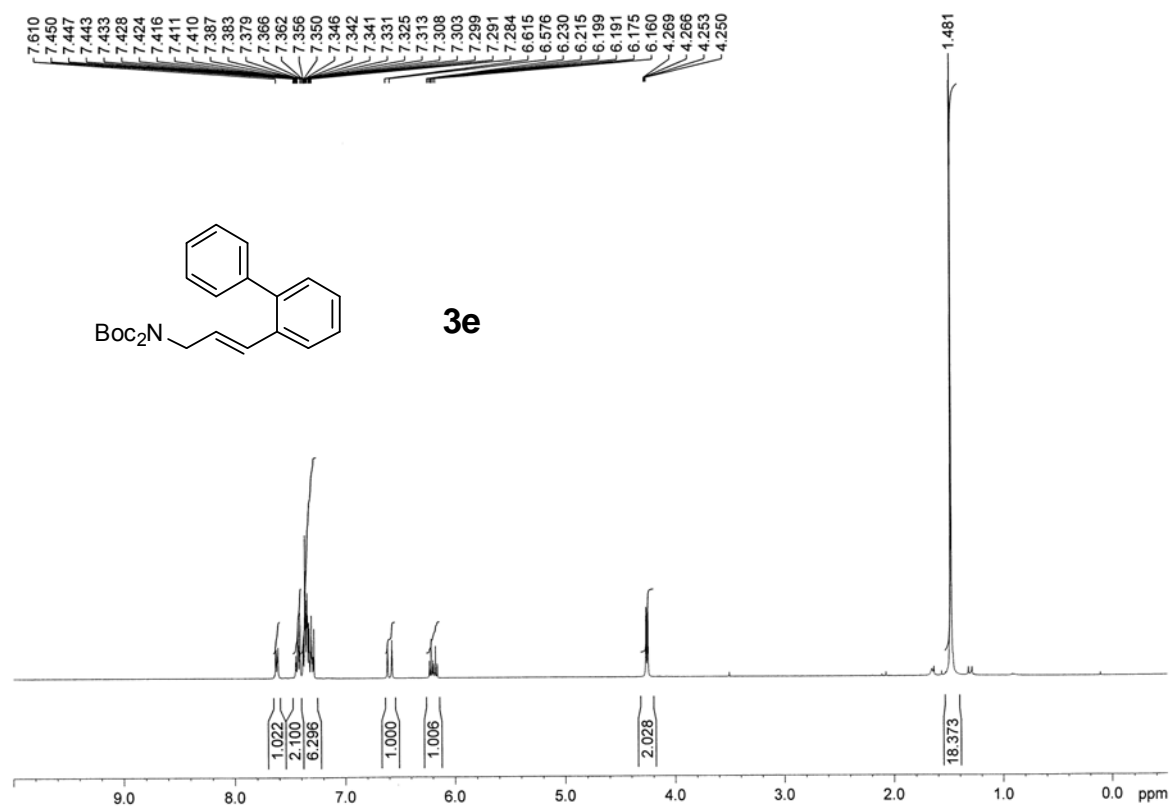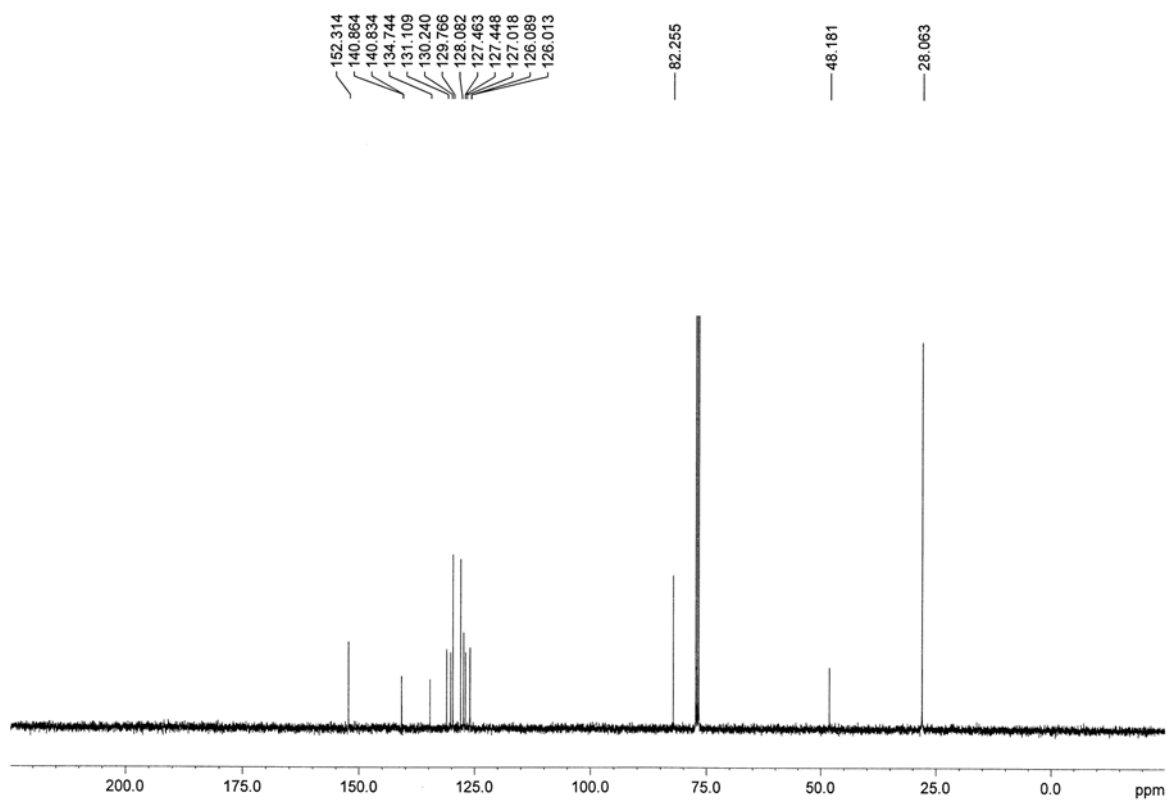

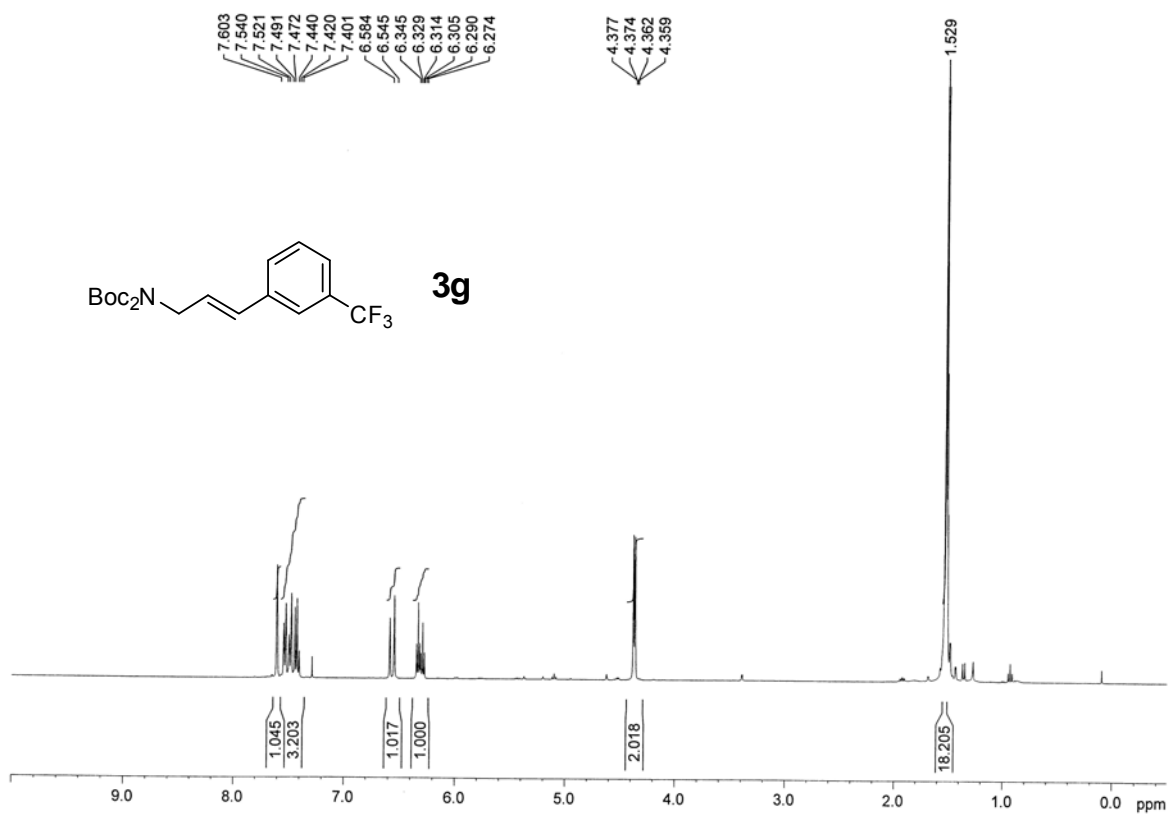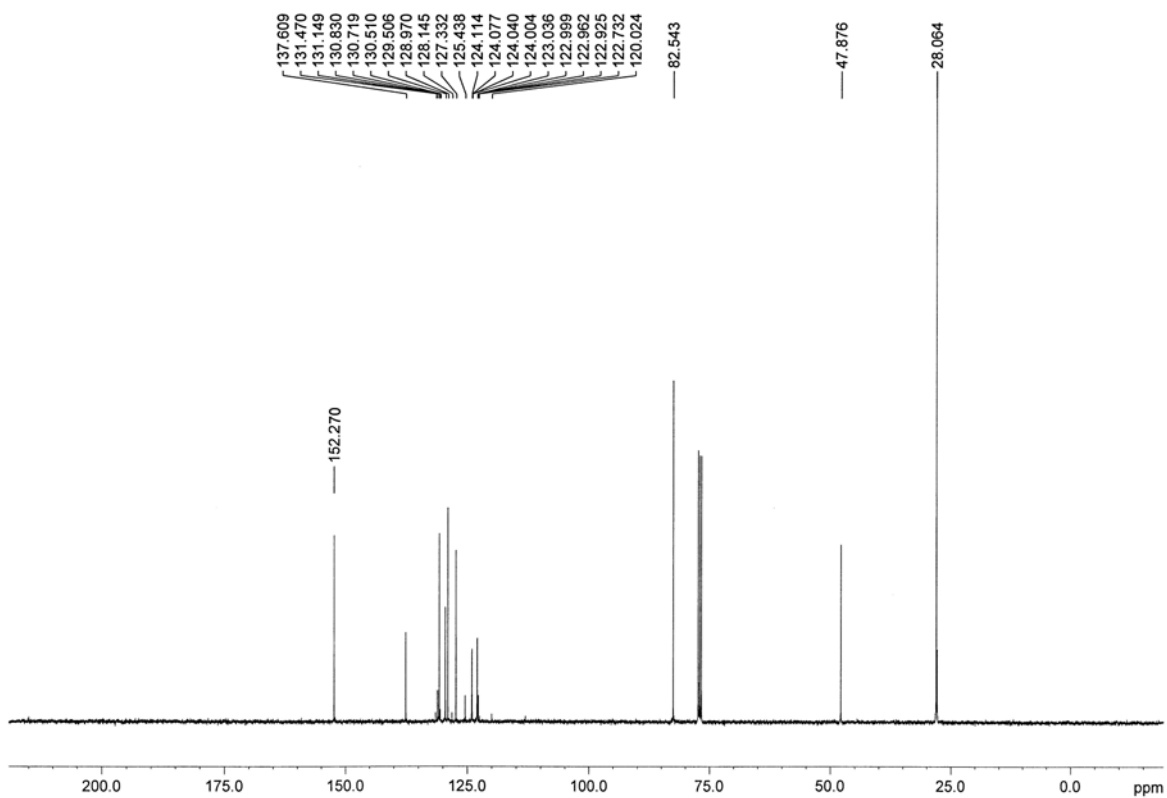

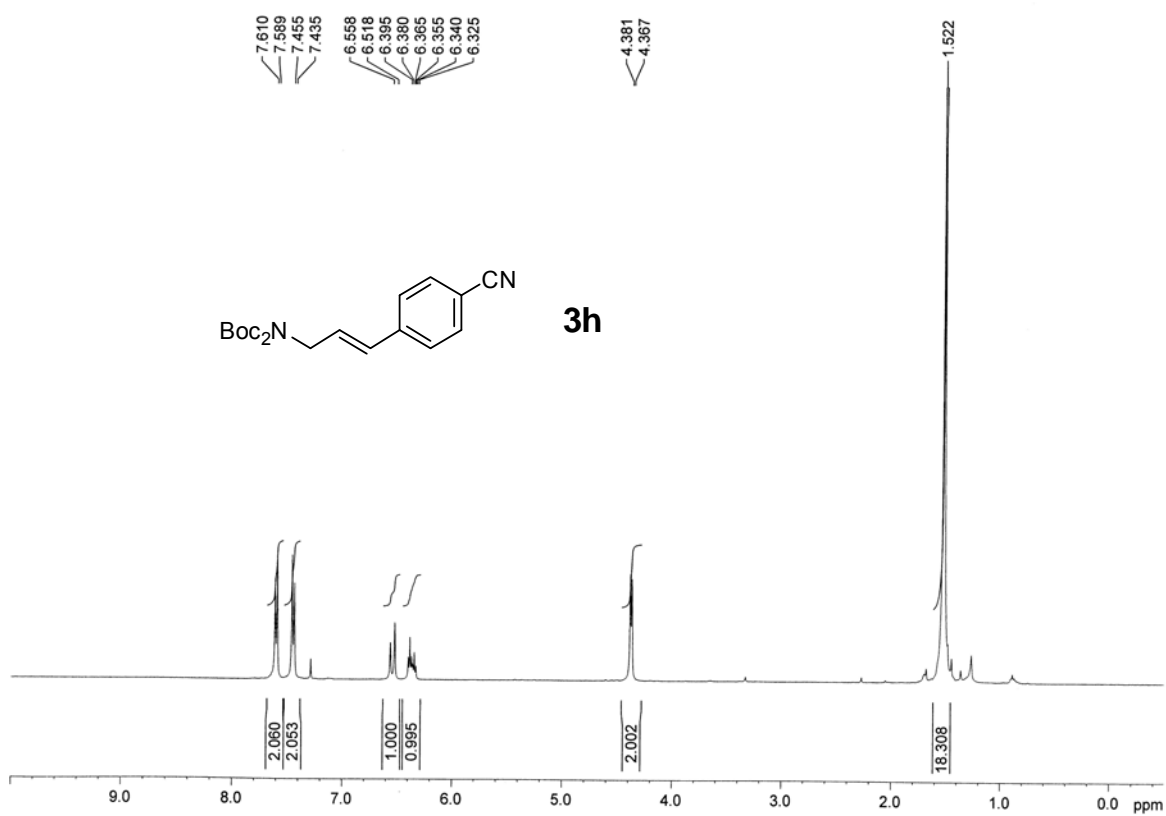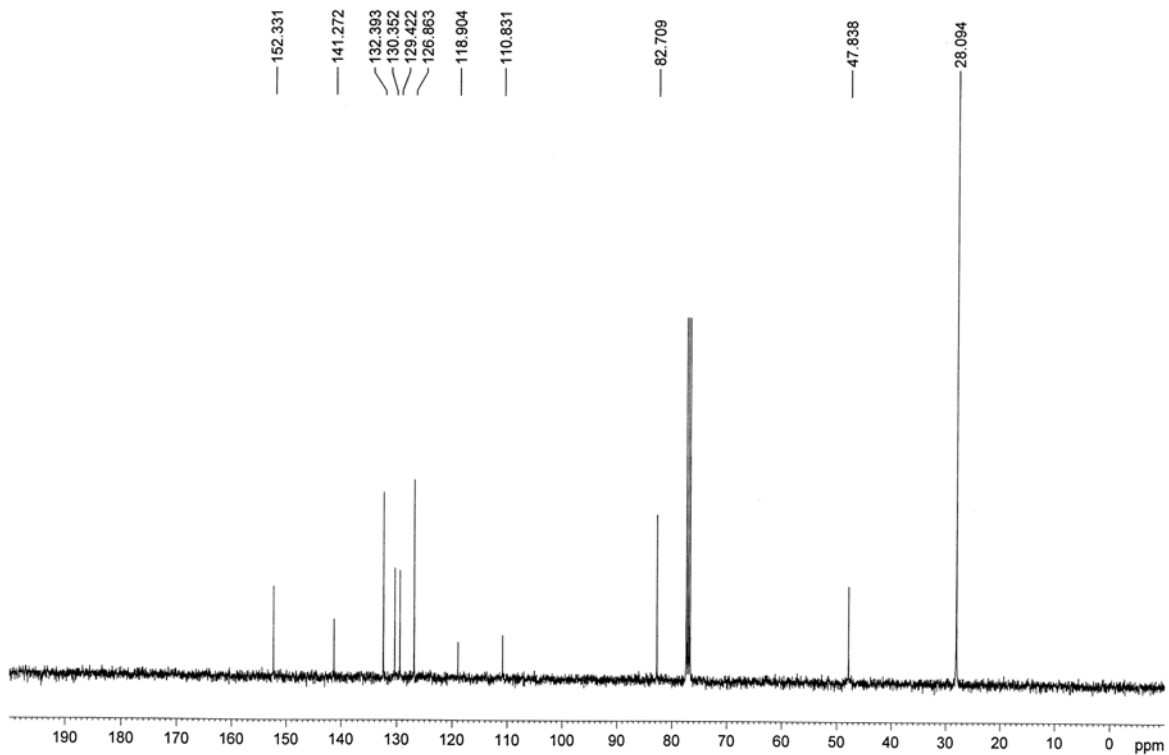



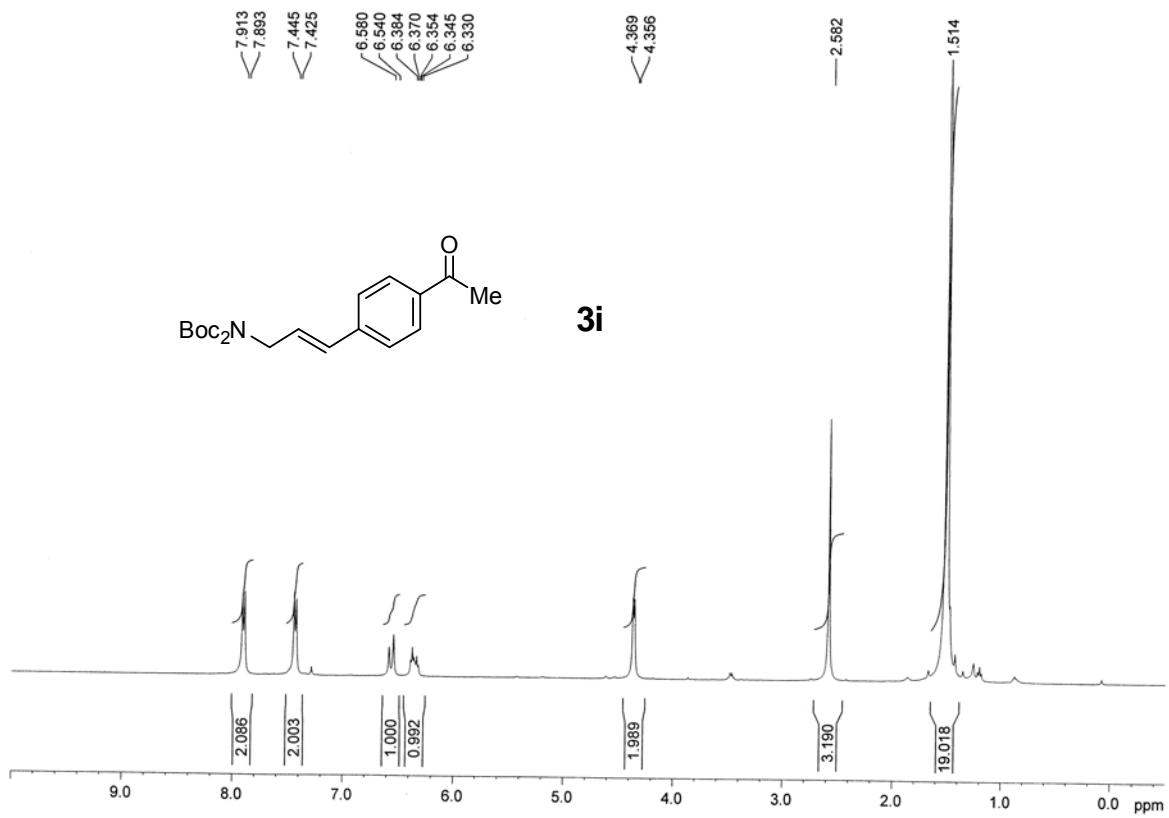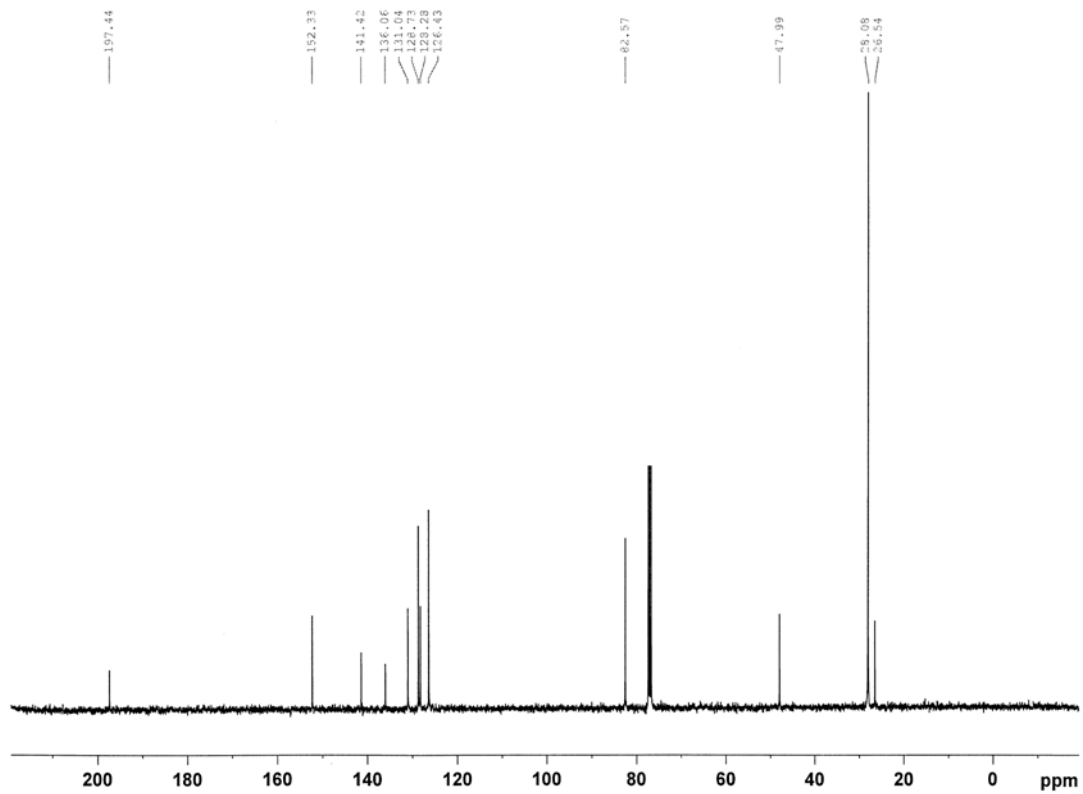

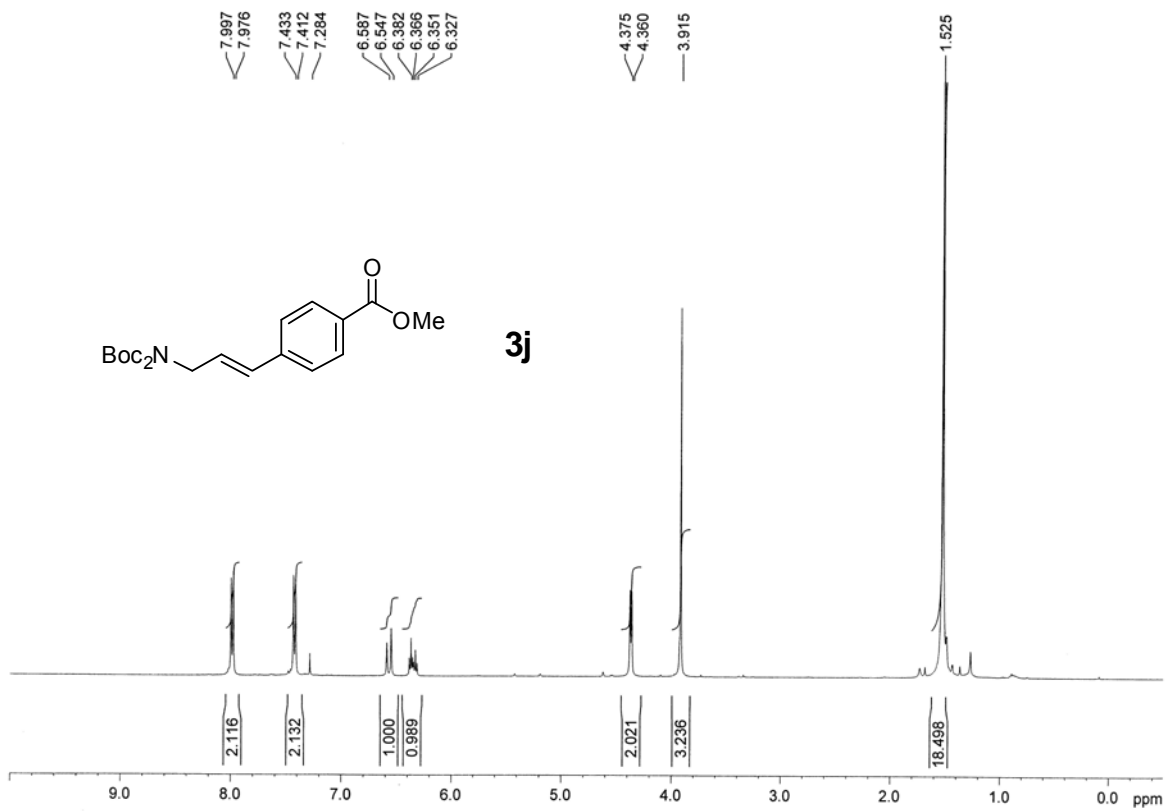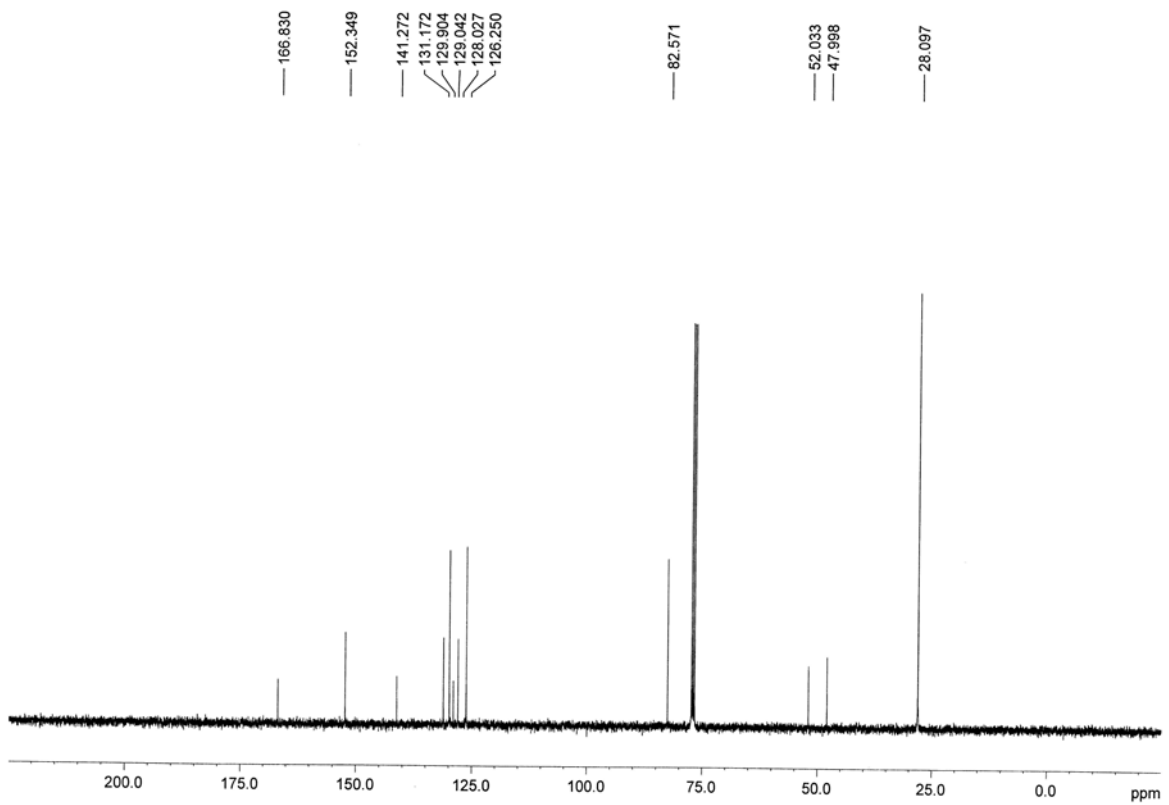

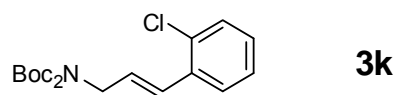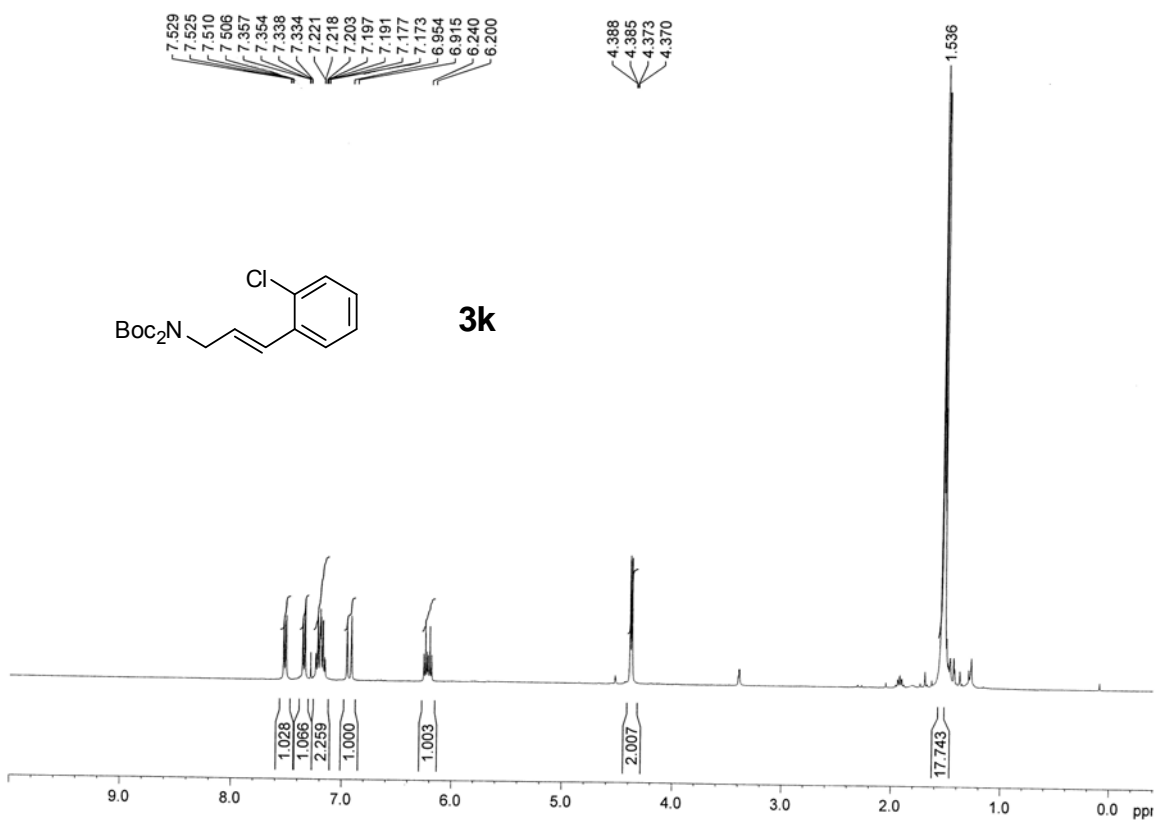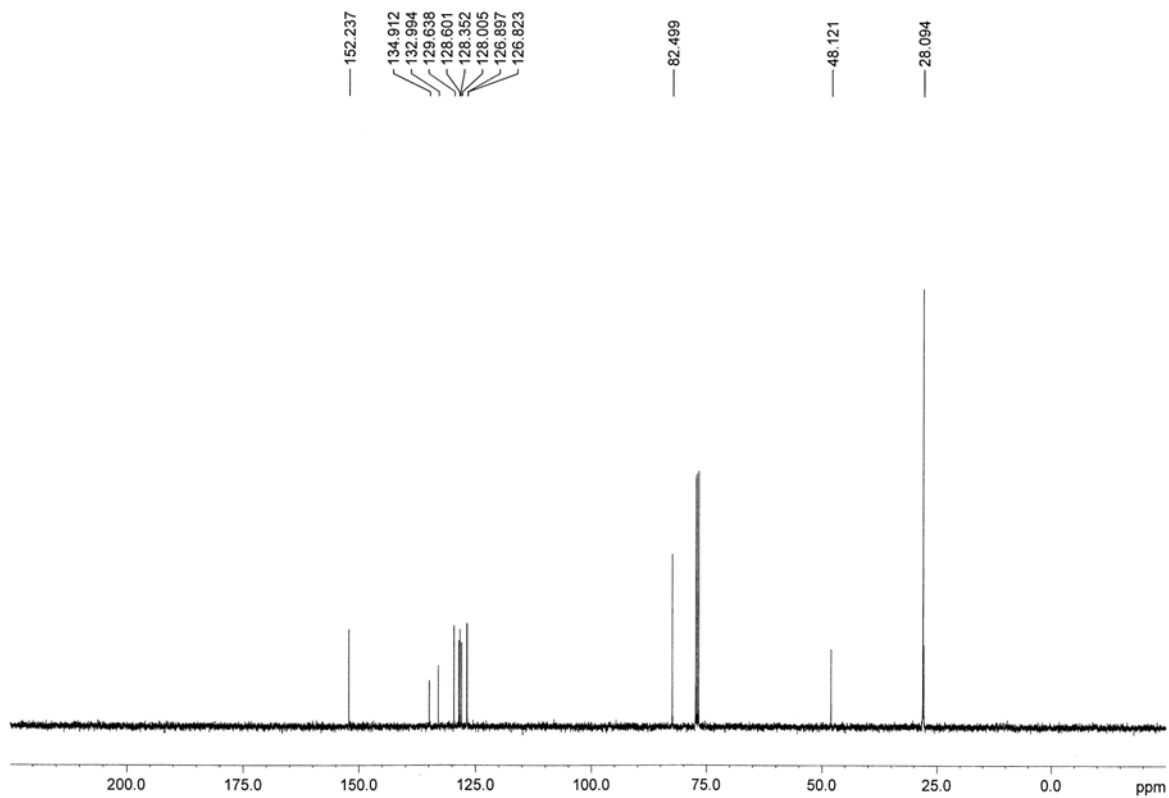

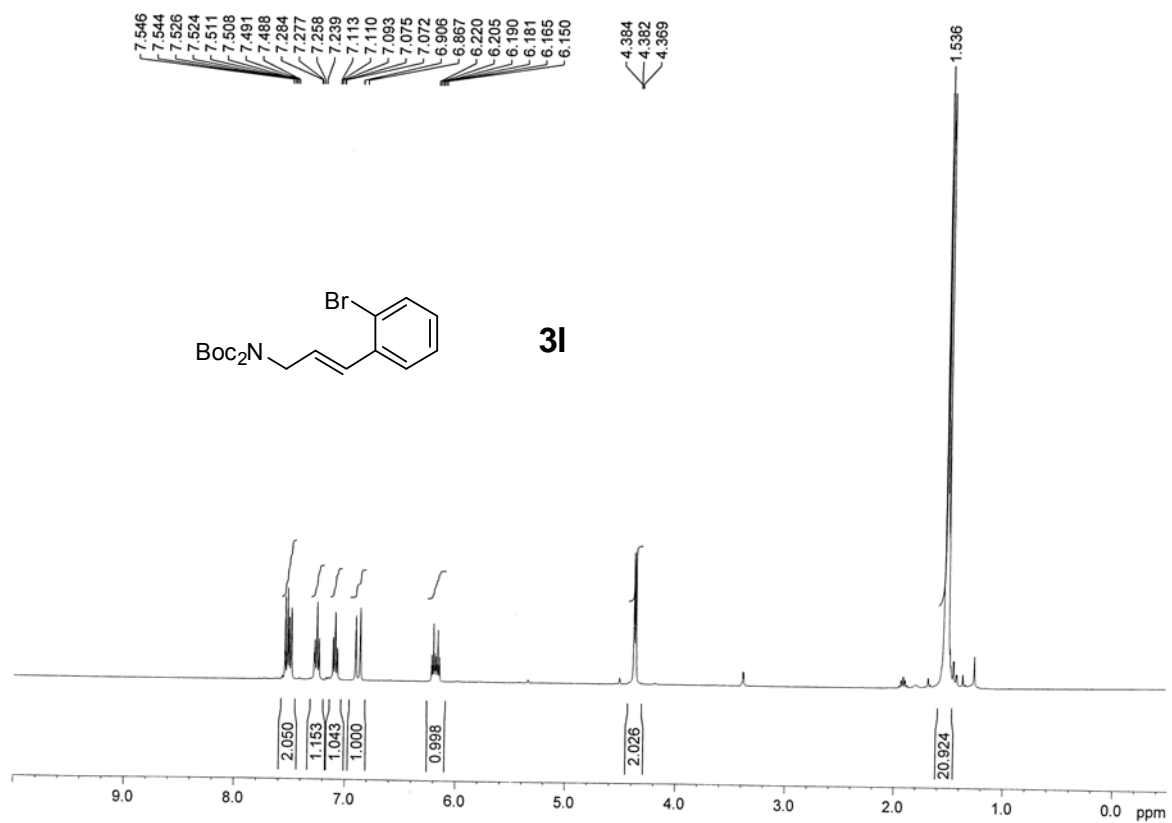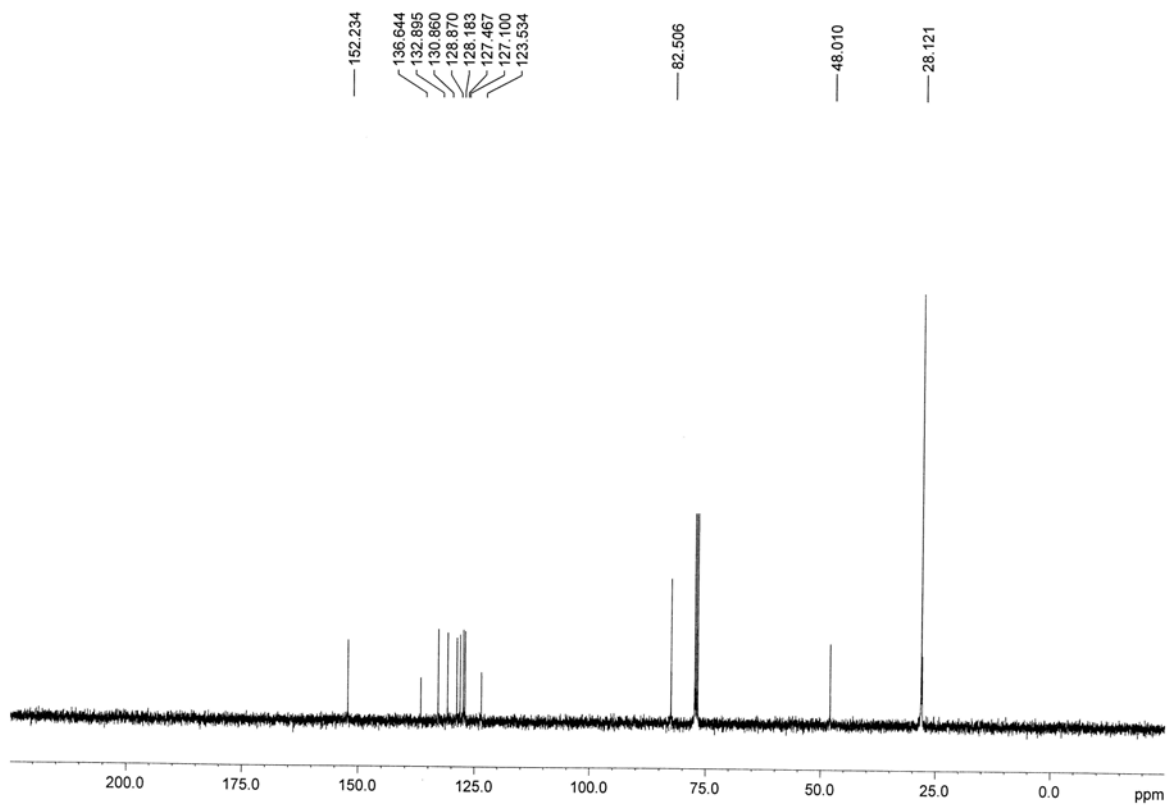

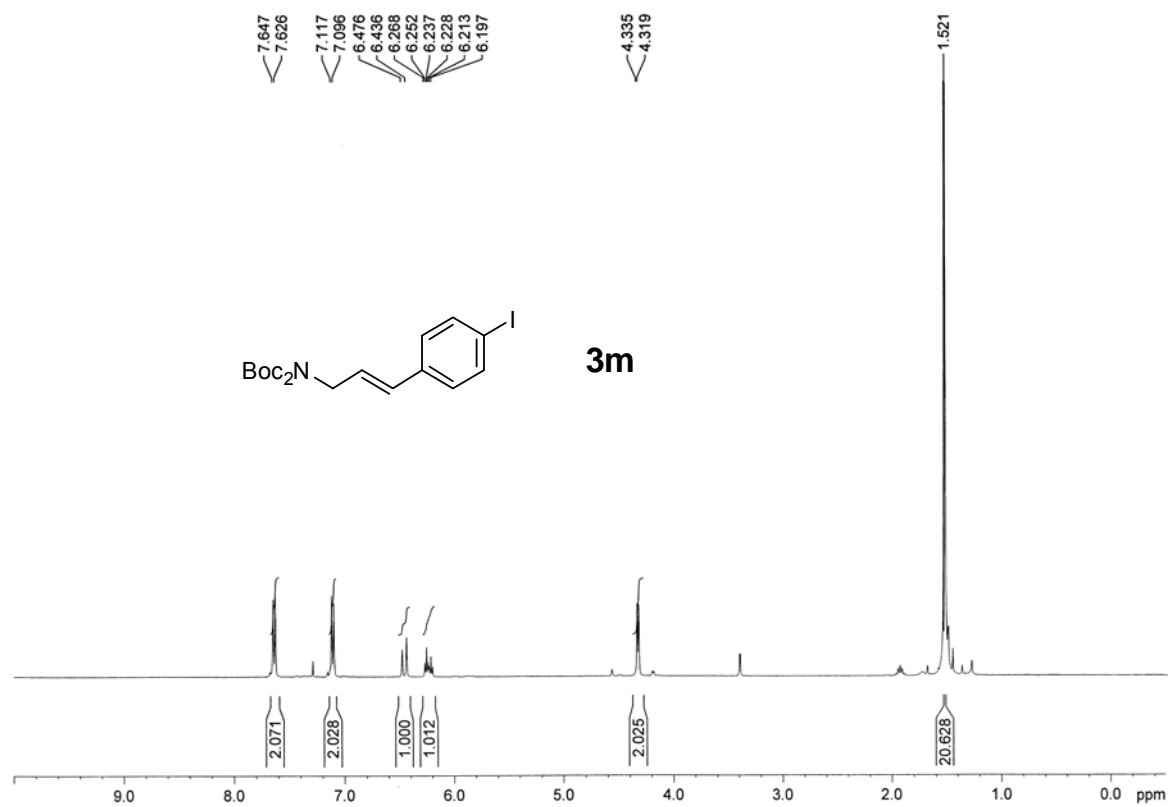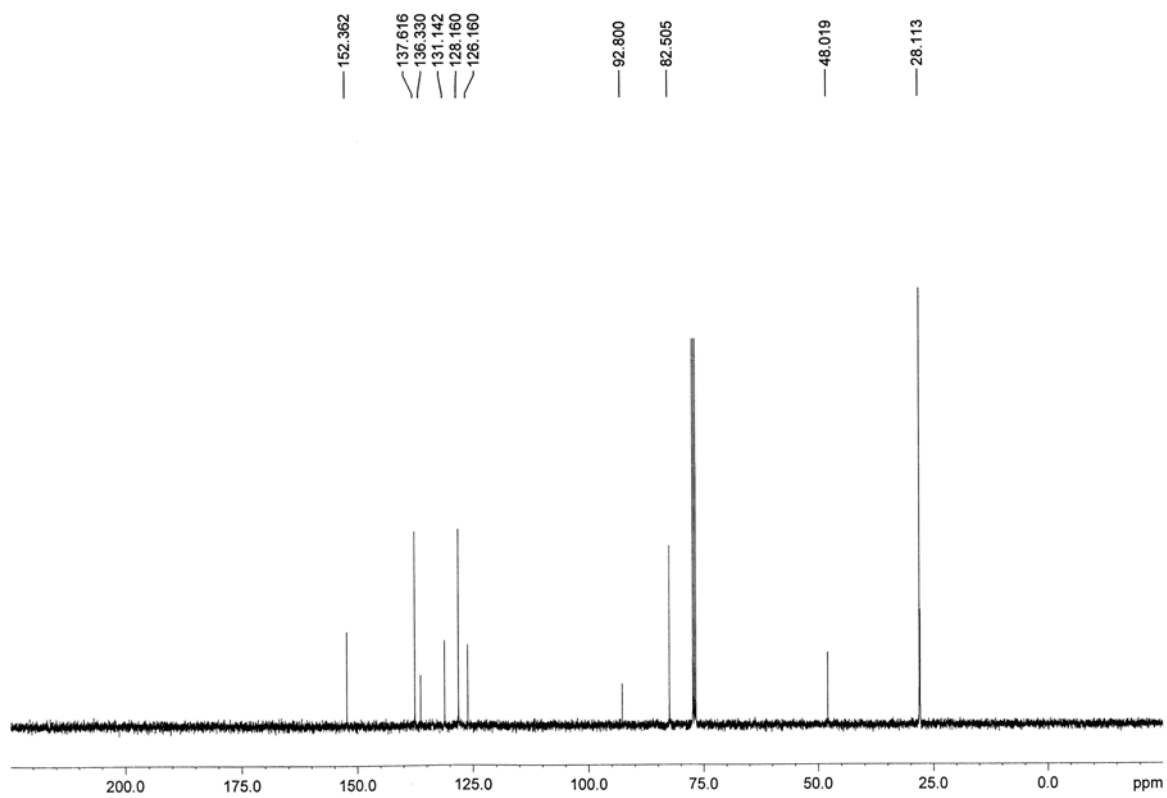

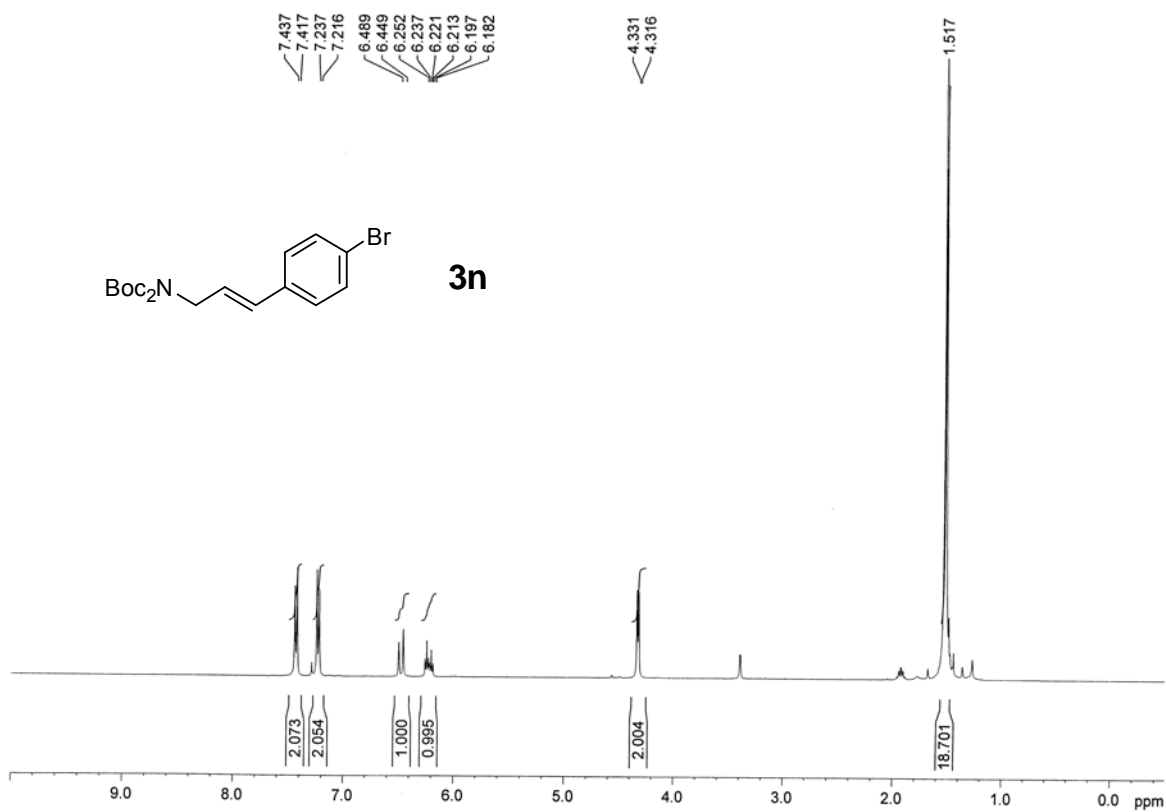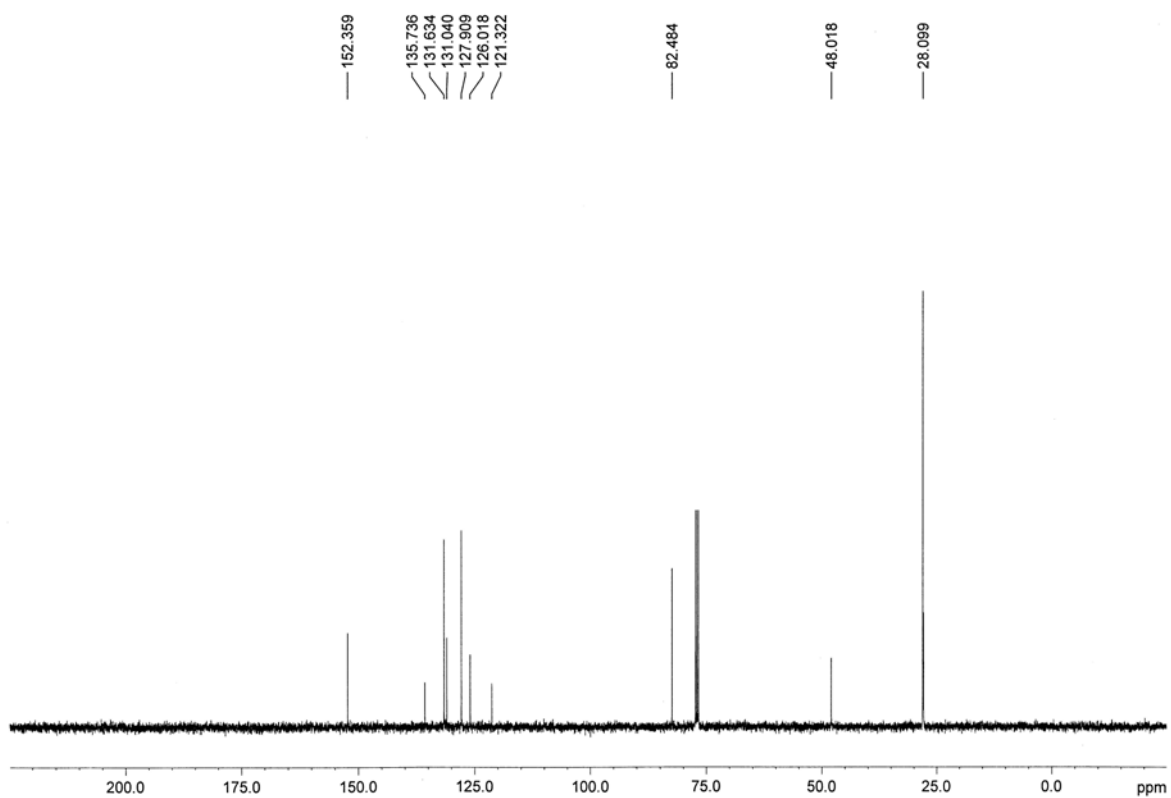

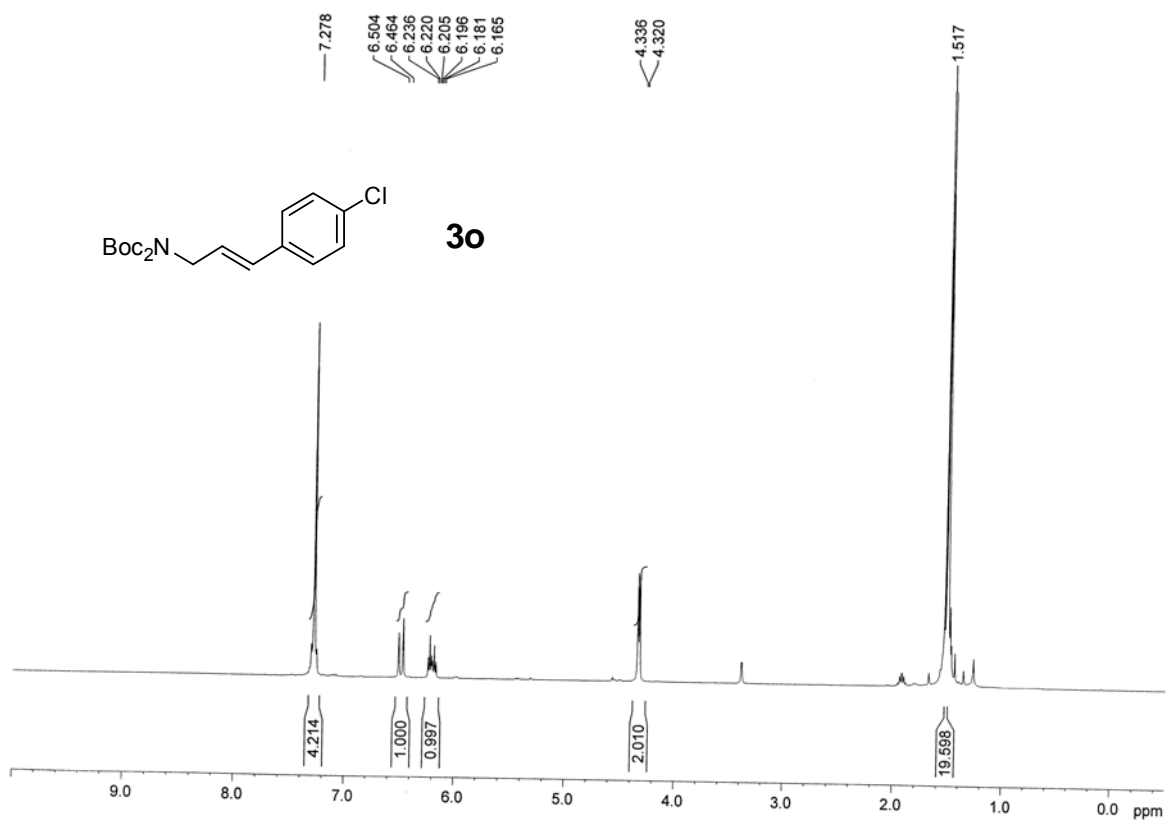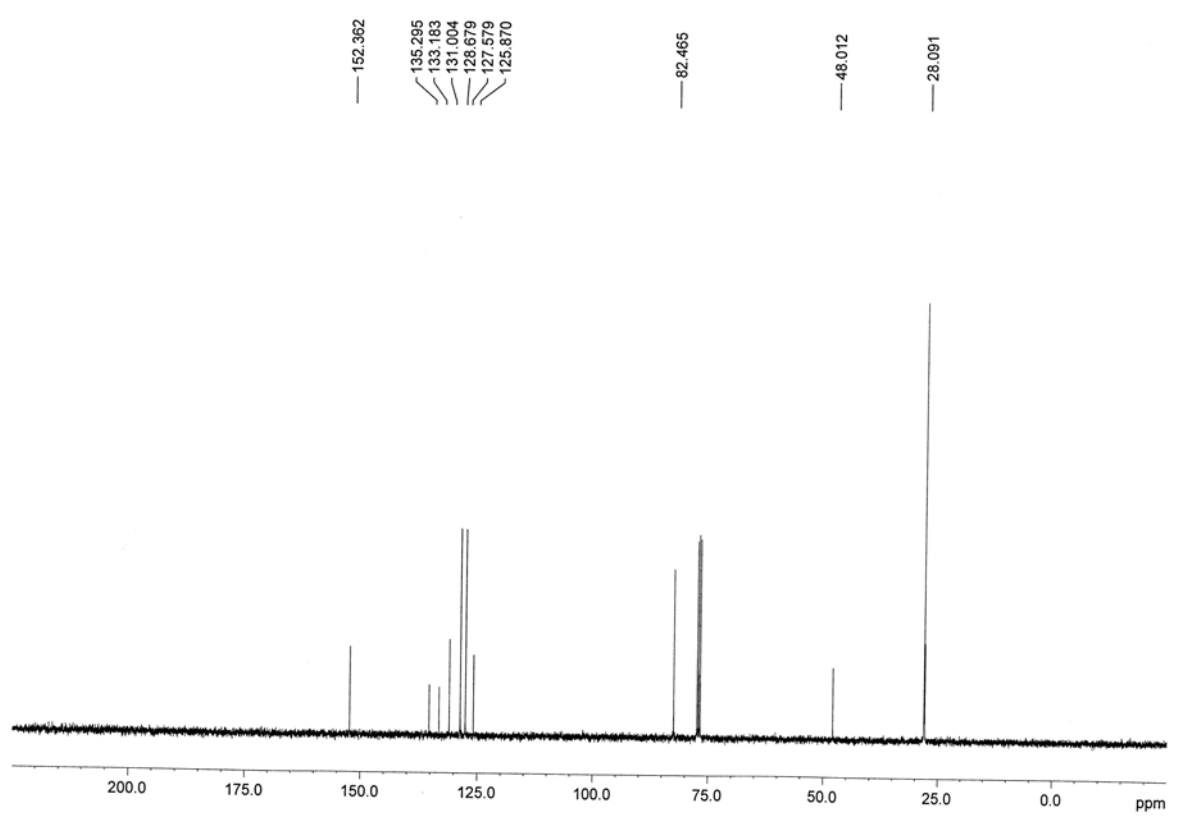

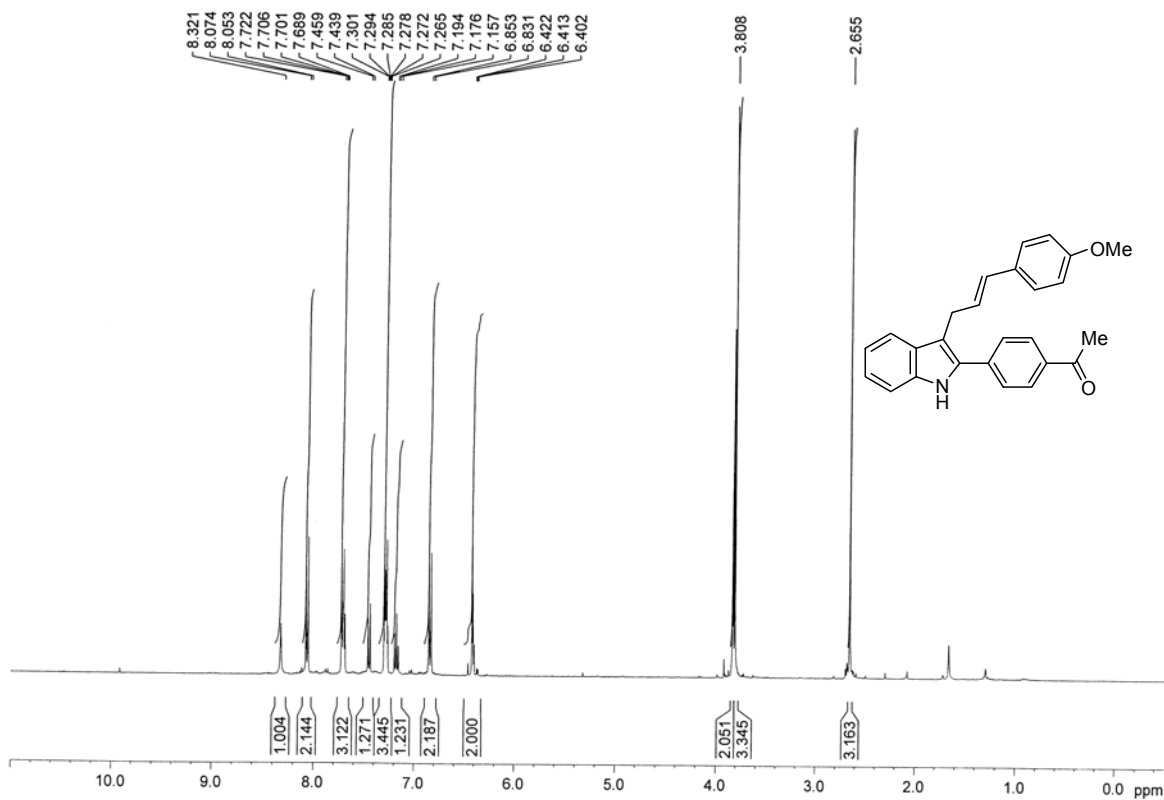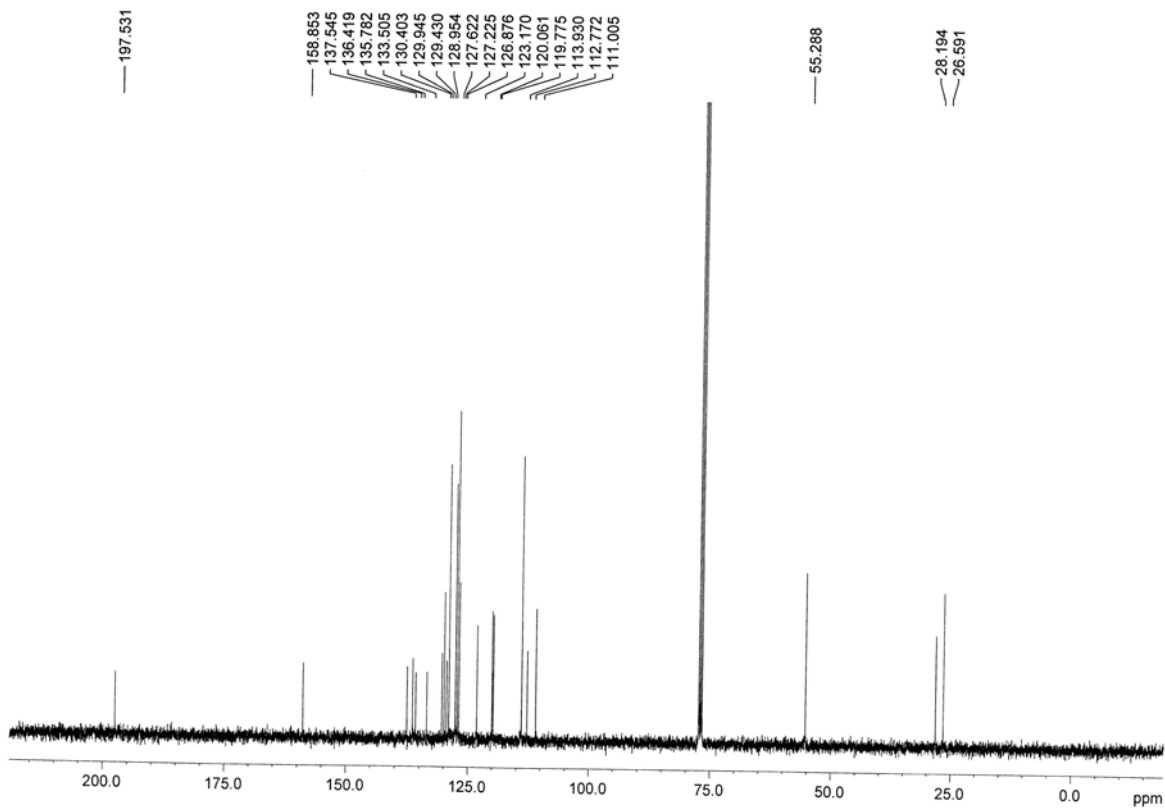



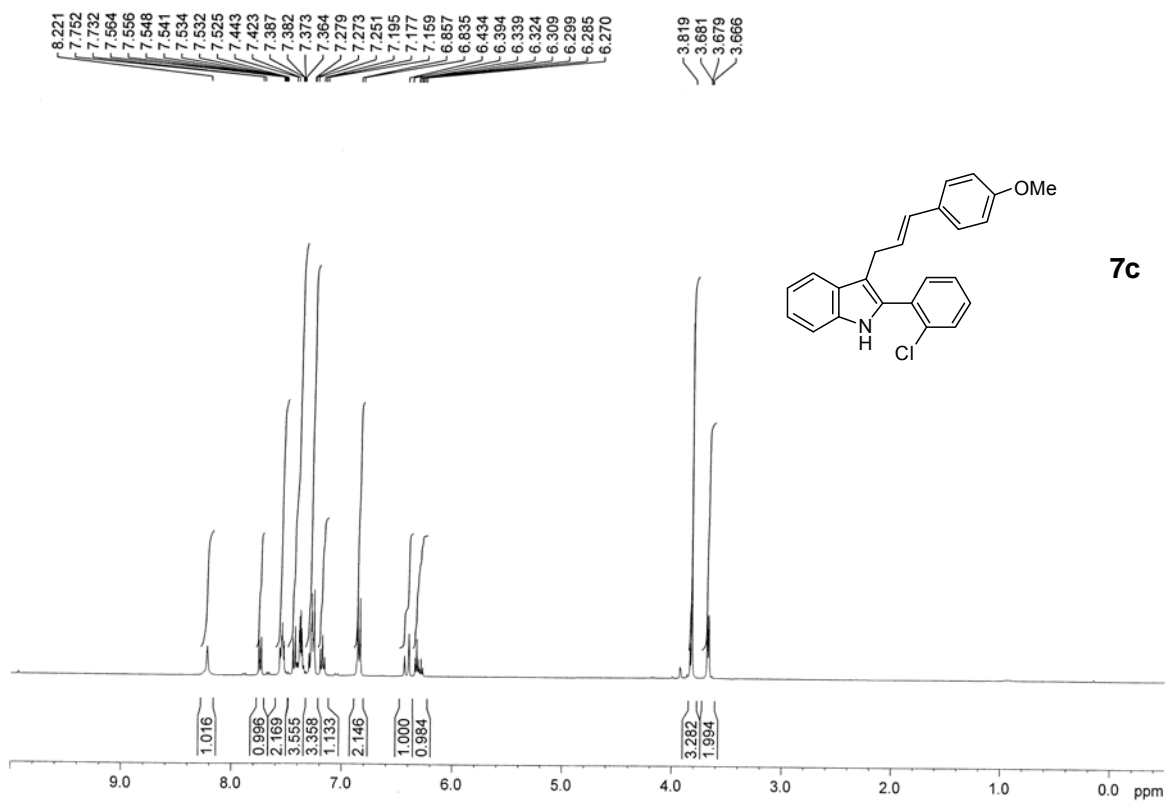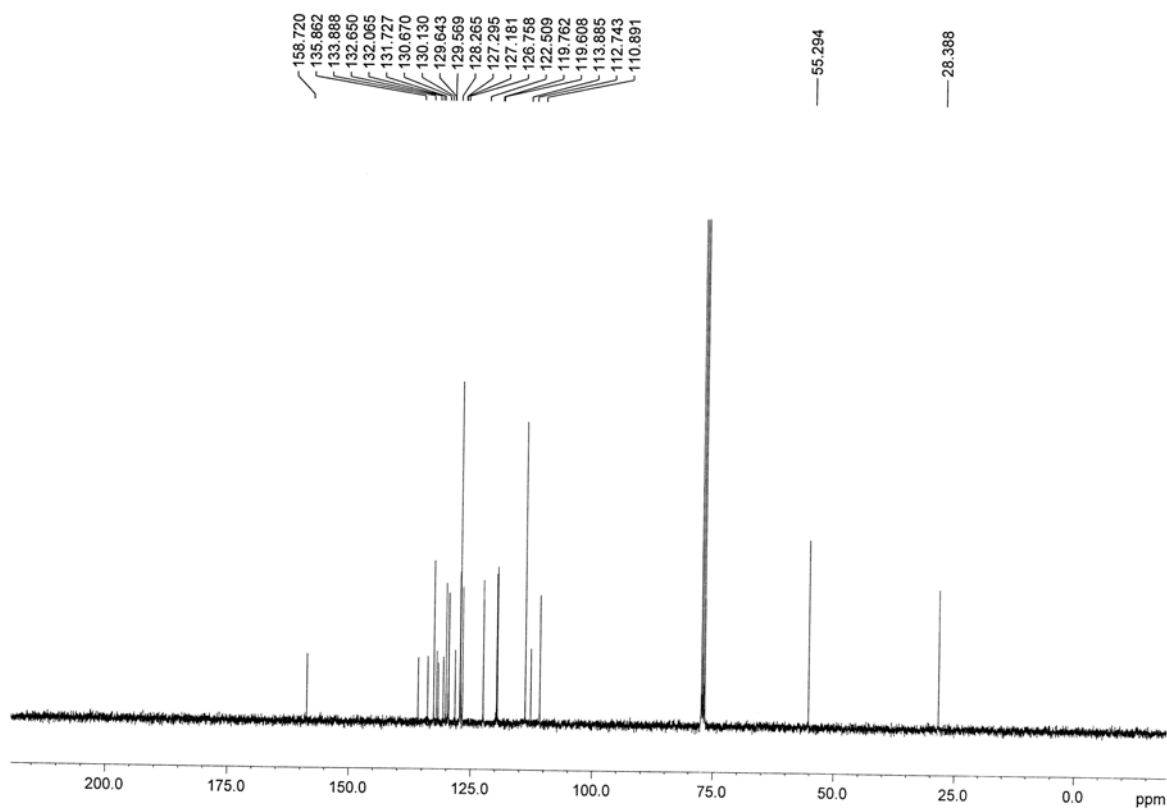

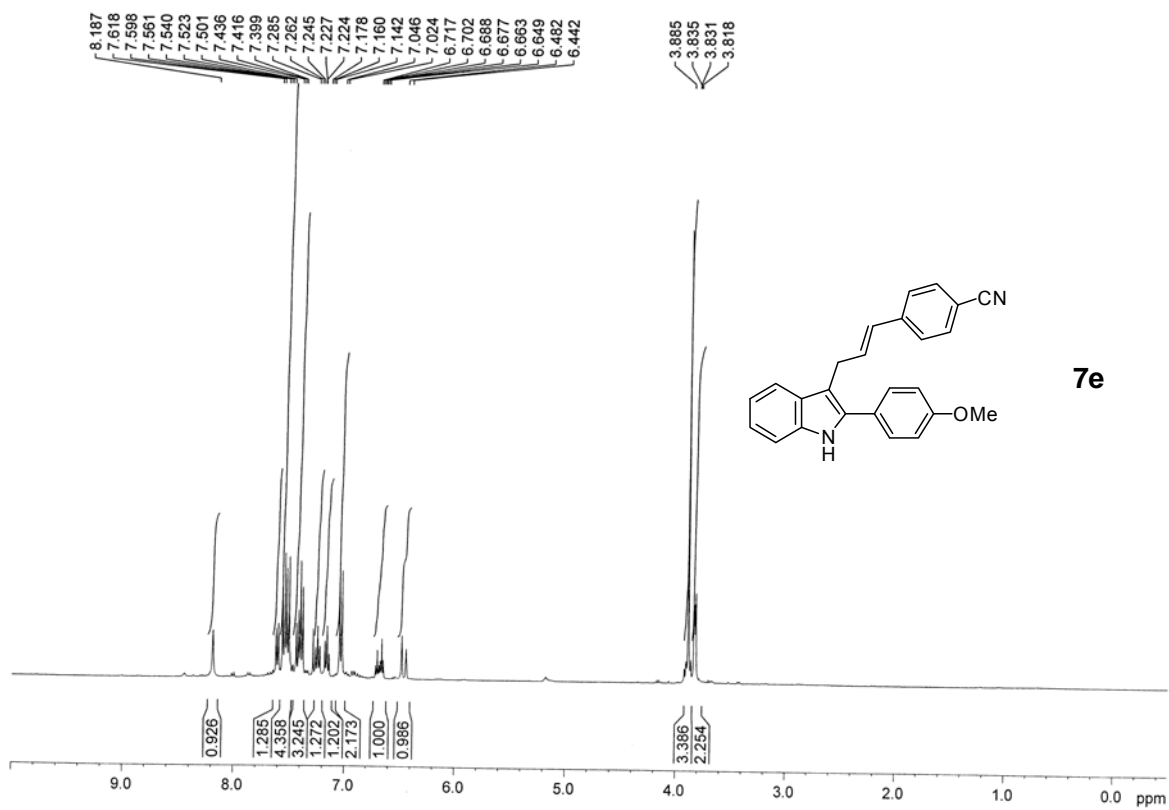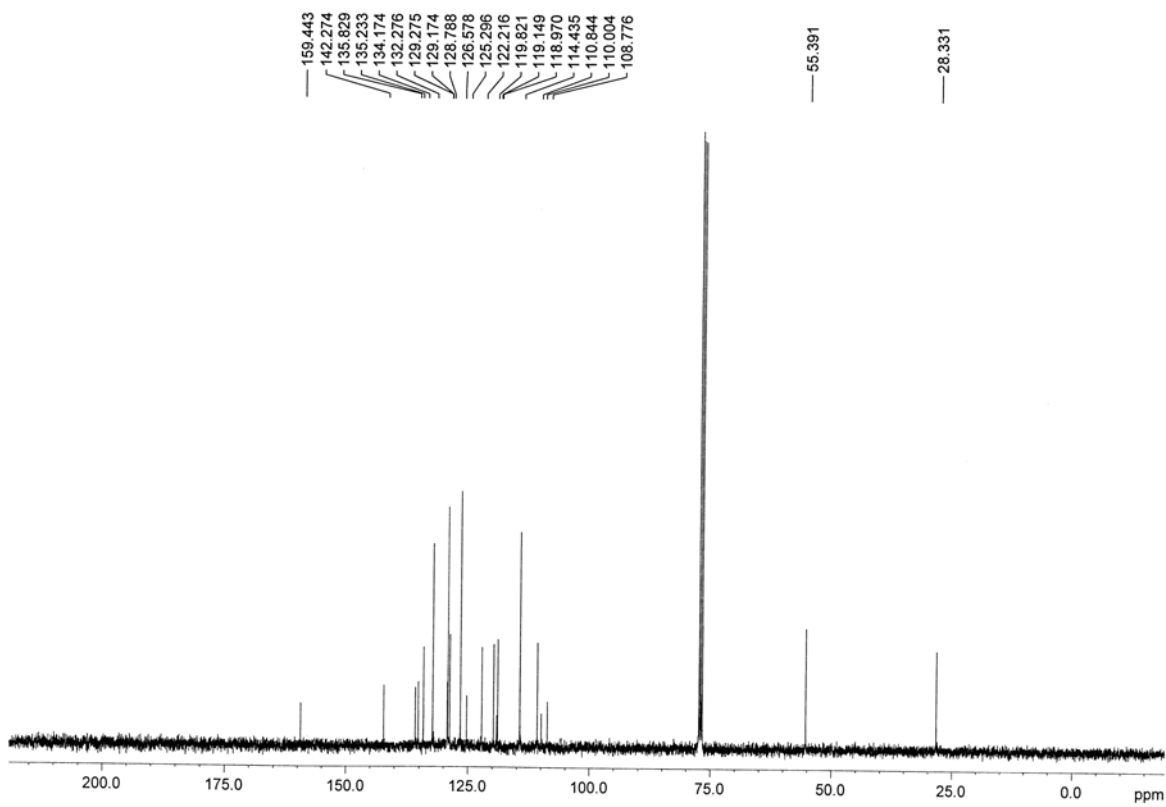

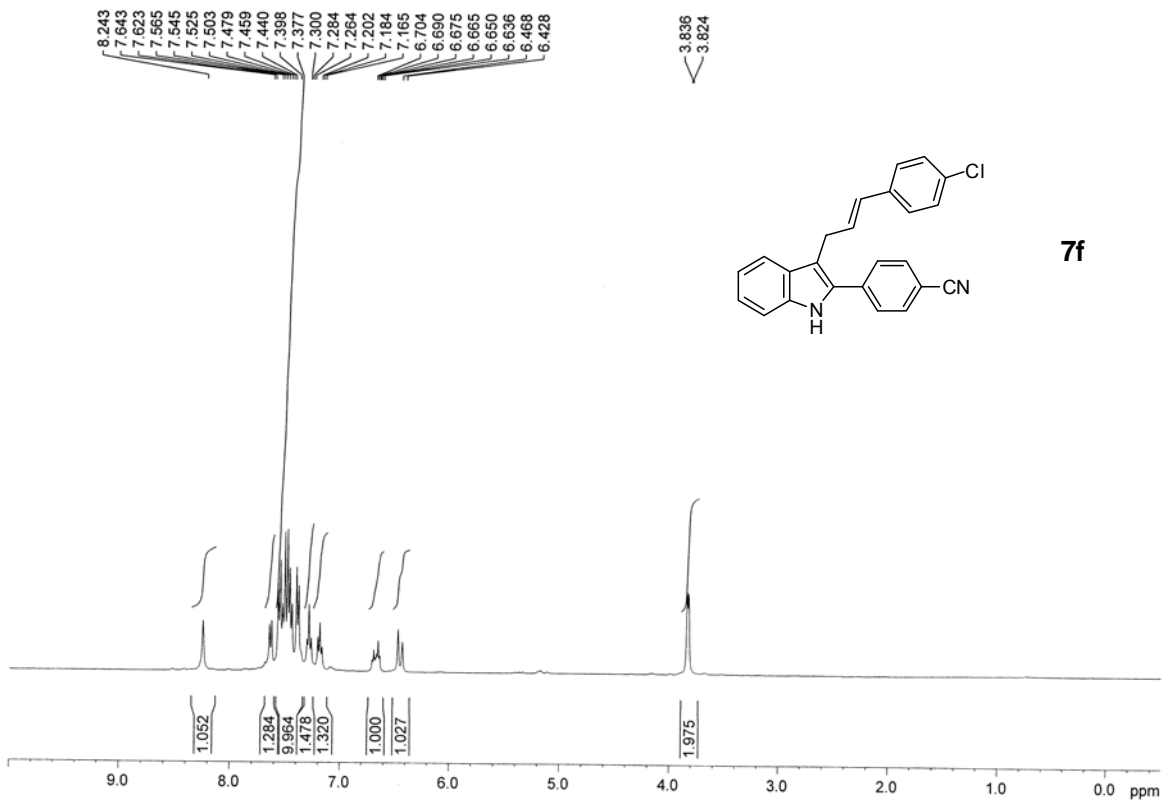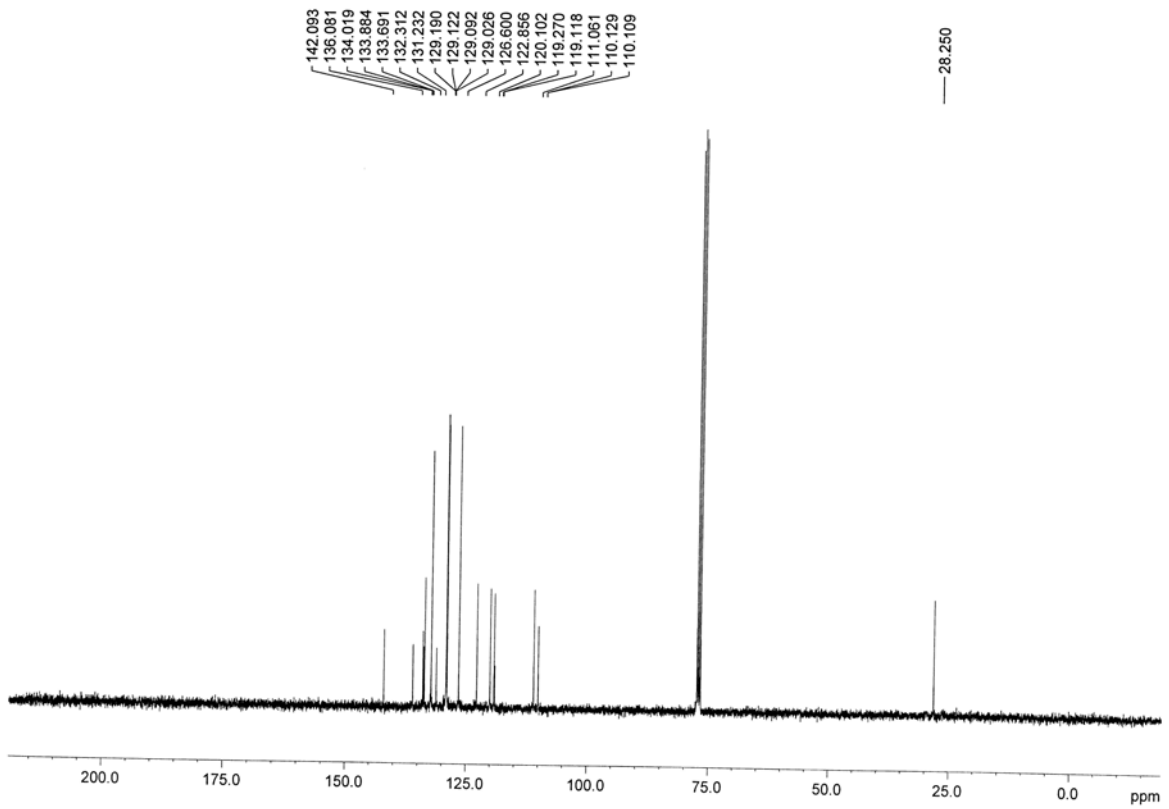

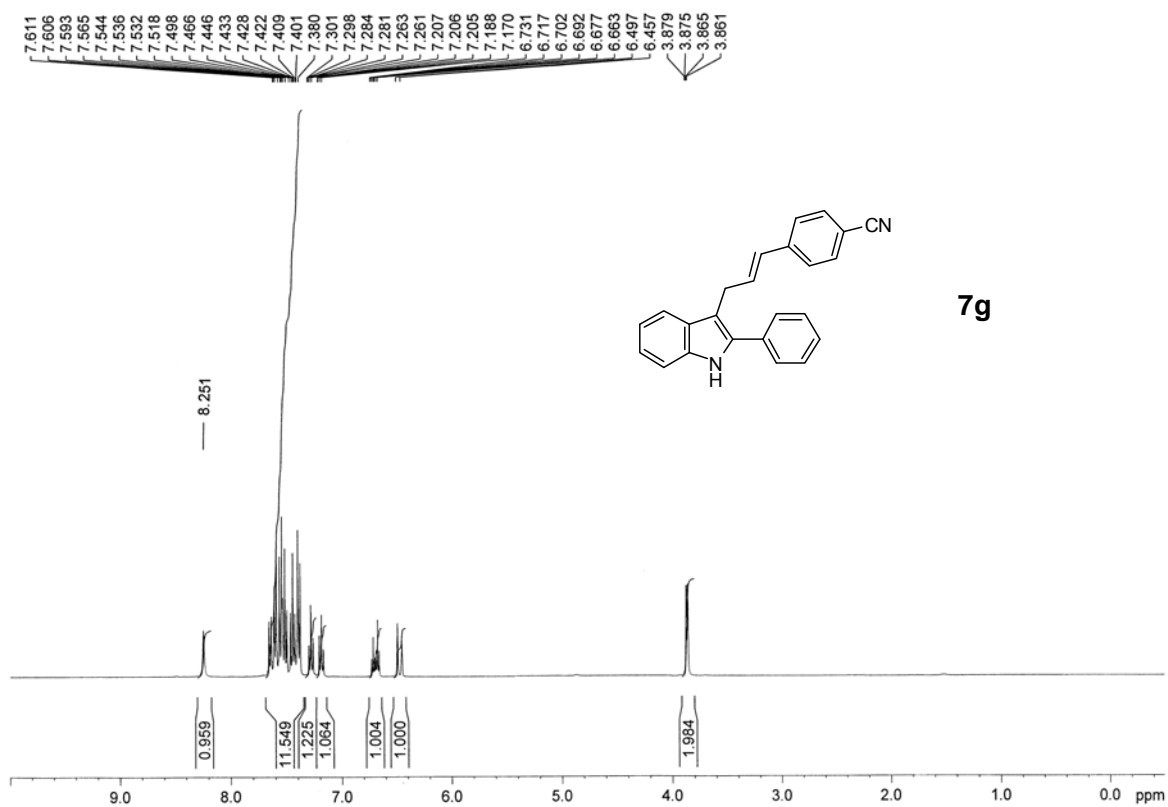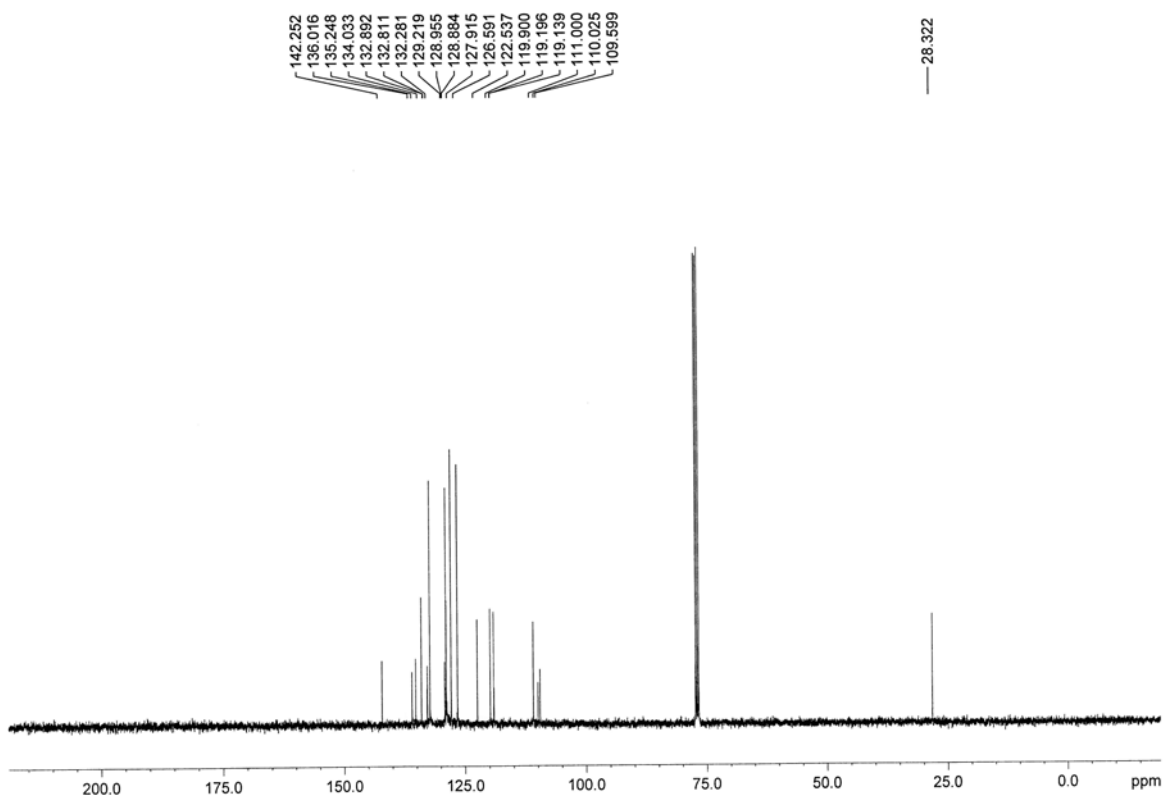

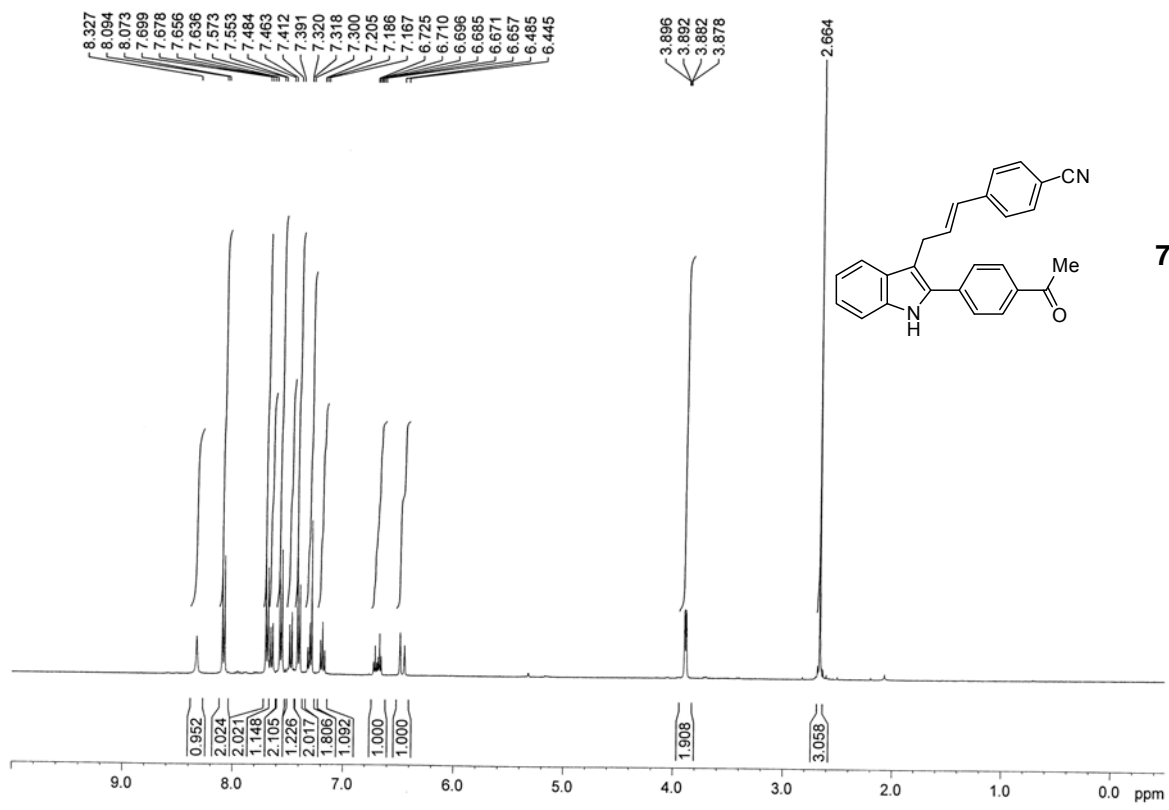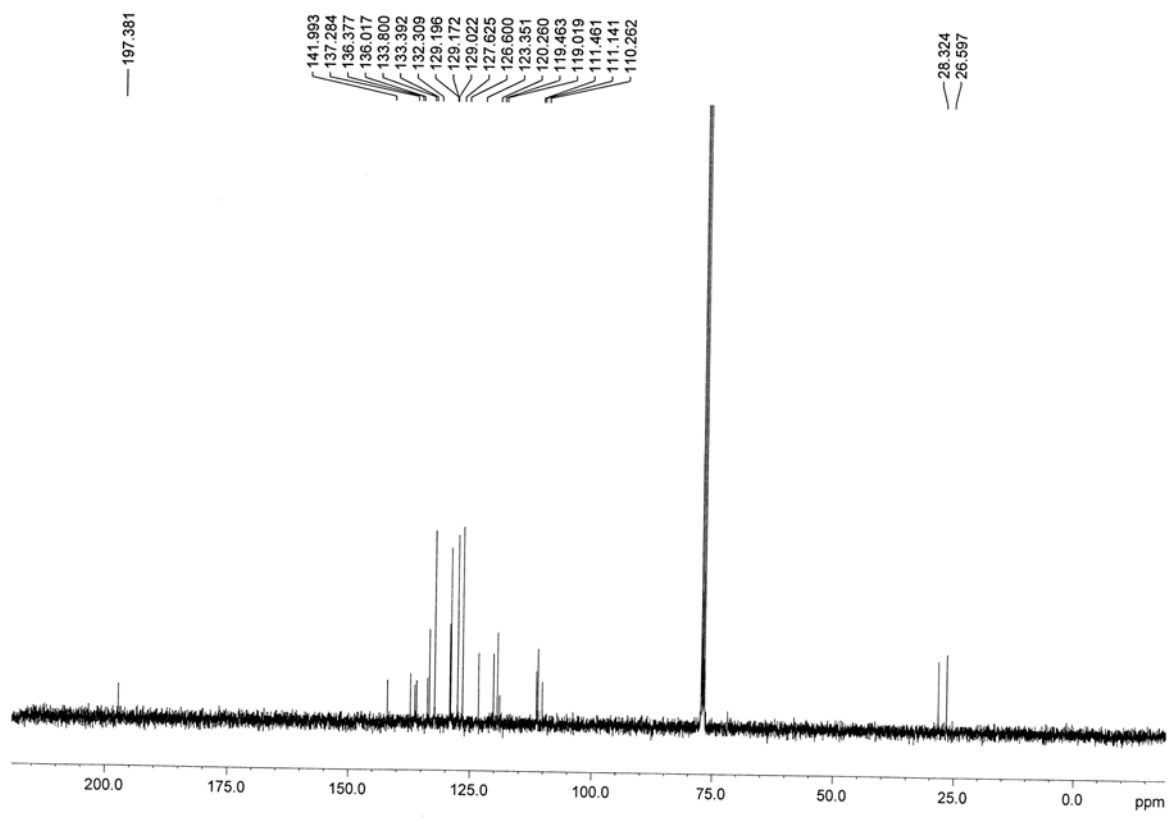

**7h**
